# Supplementary material for: Pd-catalyzed cross-coupling of carboxylic acids with nitroethane via combination of decarboxylation and dehydrogenation
Source: Royal Society of Chemistry journal article supplement (doi:10.1039/c0cc01029d), 2010-01-01

## Supporting Information

# Pd-Catalyzed Cross-Coupling of Carboxylic Acids with Nitroethane via Combination of Decarboxylation and Dehydrogenation

*Min Zhang, Jun Zhou, Jian Kan, Min Wang, Weiping Su\* and Maochun Hong*

State Key Laboratory of Structural Chemistry  
Fujian Institute of Research on the Structure of Matter, Chinese Academy of Sciences  
Fuzhou, Fujian 350002 (China)  
E-mail: [wpsu@fjirsm.ac.cn](mailto:wpsu@fjirsm.ac.cn)

### Table of Contents

| <b>Contents</b>                                                   | <b>Page Number</b> |
|-------------------------------------------------------------------|--------------------|
| 1) General comments, experimental procedures                      | <b>S 1 - S 13</b>  |
| 2) References                                                     | <b>S 14</b>        |
| 3) $^1\text{H}$ , $^{19}\text{F}$ and $^{13}\text{C}$ NMR spectra | <b>S 15 - S 33</b> |

## General comments

All reactions were carried out under N<sub>2</sub> atmosphere. The reagents used for experiments were purchased from Sigma-Aldrich, Acros and Alfa Aesar and used as received unless otherwise noted. 1,4-dioxane was distilled from sodium and benzophenone under nitrogen. DMSO was distilled from CaH<sub>2</sub> under nitrogen and stored under nitrogen. <sup>1</sup>H NMR (400 MHz), <sup>13</sup>C NMR (100 MHz) and <sup>19</sup>F NMR (377 MHz) spectra were recorded respectively using a Bruker AVANCE 400 spectrometer. Elemental analysis, Mass spectra, Gas chromatography (GC) and Gas chromatography-mass spectra (GC-MS) were performed by the analysis center of our institute.

## Products

### General procedure:

In a glove box, the Schlenk tube equipped with a stir bar was charged with Pd(OOCF<sub>3</sub>)<sub>2</sub> (0.02 mmol, 0.1 equiv), Ag<sub>2</sub>CO<sub>3</sub> (0.4 mmol, 2.0 equiv), PivOH (0.5 mmol, 2.5 equiv) and benzoic acid (0.2 mmol, 1.0 equiv). The tube was fitted with a rubber septum and removed out of the glove box. The nitroethane (1.4 mmol, 7.0 equiv), DMSO (0.2 mL) and 1,4-dioxane (2.0 mL) were added in turn to the Schlenk tube through the rubber septum using syringes, and then the septum was replaced by a Teflon screwcap under a nitrogen flow. The reaction mixture was stirred at 100 °C for 24 h. Upon completion, the reaction mixture was diluted with 10 mL of ethyl acetate, filtered through a pad of silica gel, followed by washing the pad of the silica gel with the same solvent (20 mL). The filtrate was washed with saturated aqueous solution of Na<sub>2</sub>CO<sub>3</sub> (30 mL) and then with water (3 × 15 mL). The organic phase was dried over Na<sub>2</sub>SO<sub>4</sub>, filtered, concentrated under reduced pressure. The residue was then purified by chromatography on silica gel to provide the corresponding product.

## Characterization

### (*E*)-2,4-dimethoxy- $\beta$ -nitrostyrene

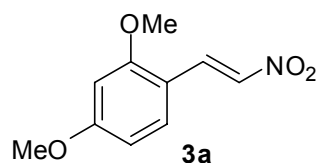

The reaction was performed following the general procedure with Pd(OOCCF<sub>3</sub>)<sub>2</sub> (0.0066 g, 0.02 mmol), Ag<sub>2</sub>CO<sub>3</sub> (0.1103 g, 0.4 mmol), PivOH (0.0512 g, 0.5 mmol), 2,4-dimethoxybenzoic acid (0.0364 g, 0.2 mmol), nitroethane (0.1 mL, 1.4 mmol), DMSO (0.2 mL) and 1,4-dioxane (2 mL). The reaction mixture was stirred at 100 °C for 24 h. After extraction and concentration, the reaction mixture was purified by column chromatography on silica gel (20% ethyl acetate/petroleum ether) afforded a yellow solid (71% yield). This compound is known.<sup>1</sup> <sup>1</sup>H NMR (400 MHz, CDCl<sub>3</sub>):  $\delta$  8.06 (d,  $J$  = 13.5 Hz, 1H), 7.81 (d,  $J$  = 13.5 Hz, 1H), 7.36 (d,  $J$  = 8.6 Hz, 1H), 6.54 (dd,  $J$  = 8.6, 2.3 Hz, 1H), 6.47 (d,  $J$  = 2.3 Hz, 1H), 3.91 (s, 3H), 3.86 (s, 3H); <sup>13</sup>C NMR (100 MHz, CDCl<sub>3</sub>):  $\delta$  164.44, 161.25, 135.98, 135.75, 134.35, 112.39, 105.98, 98.64, 55.66.

### (*E*)-2,4,5-trimethoxy- $\beta$ -nitrostyrene

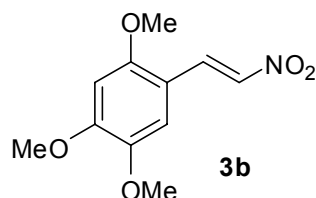

The reaction was performed following the general procedure with Pd(OOCCF<sub>3</sub>)<sub>2</sub> (0.0066 g, 0.02 mmol), Ag<sub>2</sub>CO<sub>3</sub> (0.1103 g, 0.4 mmol), PivOH (0.0512 g, 0.5 mmol), 2,4,5-trimethoxybenzoic acid (0.0424 g, 0.2 mmol), nitroethane (0.1 mL, 1.4 mmol), DMSO (0.2 mL) and 1,4-dioxane (2.0mL). The reaction mixture was stirred at 100 °C

for 24 h. After extraction and concentration, the reaction mixture was purified by column chromatography on silica gel (20% ethyl acetate/petroleum ether) afforded a reddish-orange solid (70% yield). This compound is known.<sup>1</sup> <sup>1</sup>H NMR (400 MHz, CDCl<sub>3</sub>): δ 8.13 (d, *J* = 13.5 Hz, 1H), 7.76 (d, *J* = 13.5 Hz, 1H), 6.88 (s, 1H), 6.51 (s, 1H), 3.95 (s, 3H), 3.93 (s, 3H), 3.86 (s, 3H); <sup>13</sup>C NMR (100 MHz, CDCl<sub>3</sub>): δ 155.78, 153.95, 143.41, 135.87, 135.37, 113.69, 110.45, 96.39, 56.53, 56.18, 56.16.

**(*E*)-2,6-dimethoxy-β-nitrostyrene**

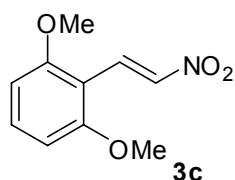

The reaction was performed following the general procedure with Pd(OOCF<sub>3</sub>)<sub>2</sub> (0.0066 g, 0.02 mmol), Ag<sub>2</sub>CO<sub>3</sub> (0.1103 g, 0.4 mmol), PivOH (0.0512 g, 0.5 mmol) 2,6-dimethoxybenzoic acid (0.0364 g, 0.2 mmol), nitroethane (0.1 mL, 1.4 mmol), DMSO (0.3 mL) and 1,4-dioxane (2.0 mL). The reaction mixture was stirred at 80 °C for 24 h. After extraction and concentration, the reaction mixture was purified by column chromatography on silica gel (10% ethyl acetate/petroleum ether) afforded a yellow solid (74% yield). This compound is known.<sup>2</sup> <sup>1</sup>H NMR (400 MHz, CDCl<sub>3</sub>): δ 8.55 (d, *J* = 13.6 Hz, 1H), 8.07 (d, *J* = 13.6 Hz, 1H), 7.38 (t, *J* = 8.4 Hz, 1H), 6.58 (d, *J* = 8.5 Hz, 2H), 3.93 (s, 6H); <sup>13</sup>C NMR (100 MHz, CDCl<sub>3</sub>): δ 160.72, 138.88, 133.61, 129.83, 108.60, 103.69, 55.99. Anal. Calcd. For C<sub>10</sub>H<sub>11</sub>NO<sub>4</sub>: C, 57.41; H, 5.30; N, 6.70, Found: C, 57.63; H, 5.28; N, 6.50.

**(*E*)-2,4,6-trimethoxy-β-nitrostyrene**

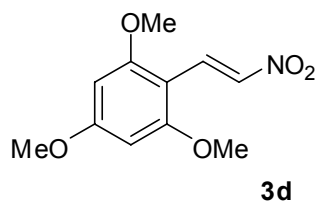

The reaction was performed following the general procedure with Pd(OOCCF<sub>3</sub>)<sub>2</sub> (0.0066 g, 0.02 mmol), Ag<sub>2</sub>CO<sub>3</sub> (0.1103 g, 0.4 mmol), PivOH (0.0512 g, 0.5 mmol), 2,4,6-trimethoxybenzoic acid (0.0424 g, 0.2 mmol), nitroethane (0.1 mL, 1.4 mmol), DMSO (0.8 mL) and 1,4-dioxane (1.2 mL). The reaction mixture was stirred at 100 °C for 24 h. After extraction and concentration, the reaction mixture was purified by column chromatography on silica gel (10% ethyl acetate/petroleum ether) afforded a yellow solid (28% yield). <sup>1</sup>H NMR (400 MHz, CDCl<sub>3</sub>): δ 8.50 (d, *J* = 13.5 Hz, 1H), 7.98 (d, *J* = 13.5 Hz, 1H), 6.12 (s, 2H), 3.91 (s, 6H), 3.87 (s, 3H); <sup>13</sup>C NMR (100 MHz, CDCl<sub>3</sub>): δ 164.97, 162.14, 136.31, 130.28, 102.27, 90.59, 55.92, 55.56. Anal. Calcd. for C<sub>11</sub>H<sub>13</sub>NO<sub>5</sub>: C, 55.23; H, 5.48; N, 5.86. Found: C, 55.42; H, 5.43; N, 5.73.

**(*E*)-2-methoxy-4-methyl-β-nitrostyrene**

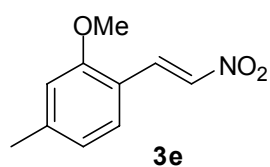

The reaction was performed following the general procedure with Pd(OOCCF<sub>3</sub>)<sub>2</sub> (0.0066 g, 0.02 mmol), Ag<sub>2</sub>CO<sub>3</sub> (0.1103 g, 0.4 mmol), PivOH (0.0512 g, 0.5 mmol) 2-methoxy-4-methylbenzoic acid (0.0332 g, 0.2 mmol), nitroethane (0.1 mL, 1.4 mmol), DMSO (0.1 mL) and 1,4-dioxane (2.0 mL). The reaction mixture was stirred at 120 °C for 24 h. After extraction and concentration, the reaction mixture was purified by column chromatography on silica gel (5% ethyl acetate/petroleum ether) afforded a yellow solid (65% yield). This compound is known.<sup>3</sup> <sup>1</sup>H NMR (400 MHz, CDCl<sub>3</sub>): δ 8.10 (d, *J* = 13.5 Hz, 1H), 7.85 (d, *J* = 13.5 Hz, 1H), 7.32 (d, *J* = 7.8 Hz, 1H), 6.83 (d, *J* = 7.7 Hz, 1H), 6.78 (s, 1H), 3.93 (s, 3H), 2.41 (s, 3H); <sup>13</sup>C NMR

(100MHz, CDCl<sub>3</sub>):  $\delta$  159.55, 144.84, 137.44, 135.65, 132.50, 122.04, 116.51, 112.20, 55.55, 22.12.

**(E)-3-bromo-2,6-dimethoxy- $\beta$ -nitrostyrene**

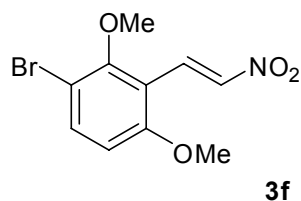

The reaction was performed following the general procedure with Pd(OOCCF<sub>3</sub>)<sub>2</sub> (0.0066 g, 0.02 mmol), Ag<sub>2</sub>CO<sub>3</sub> (0.1103 g, 0.4 mmol), 3-bromo-2,6-dimethoxybenzoic acid (0.0522 g, 0.2 mmol), nitroethane (0.1 mL, 1.4 mmol), DMSO (0.1 mL) and 1,4-dioxane (2.0 mL). The reaction mixture was stirred at 100 °C for 24 h. After extraction and concentration, the reaction mixture was purified by column chromatography on silica gel (5% ethyl acetate/petroleum ether) afforded a yellow solid (52% yield). <sup>1</sup>H NMR (400 MHz, CDCl<sub>3</sub>)  $\delta$  8.33 (d,  $J$  = 13.7 Hz, 1H), 8.08 (d,  $J$  = 13.7 Hz, 1H), 7.59 (d,  $J$  = 9.0 Hz, 1H), 6.67 (d,  $J$  = 9.0 Hz, 1H), 3.94 (s, 3H), 3.88 (s, 3H); <sup>13</sup>C NMR (100MHz, CDCl<sub>3</sub>)  $\delta$  159.72, 158.14, 140.56, 136.48, 129.21, 115.30, 108.67, 108.49, 61.76, 56.30. Anal. Calcd. for C<sub>10</sub>H<sub>10</sub>BrNO<sub>4</sub>: C, 41.69; H, 3.50; N, 4.86; Found: C, 41.99; H, 3.42; N, 4.49.

**(E)-3-chloro-2,6-dimethoxy-5-nitro- $\beta$ -nitrostyrene**

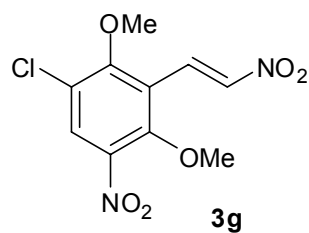

The reaction was performed following the general procedure with Pd(CH<sub>3</sub>CN)<sub>2</sub>Cl<sub>2</sub> (0.0104 g, 0.04 mmol), Ag<sub>2</sub>CO<sub>3</sub> (0.1103 g, 0.4 mmol) 3-chloro-2,6-dimethoxy-5-nitrobenzoic acid (0.0523 g, 0.2 mmol), nitroethane(0.1 mL, 1.4 mmol), DMSO (0.04 mL) and 1,4-dioxane (2.0 mL). The reaction mixture was stirred at 100 °C for 24 h. After extraction and concentration, the reaction mixture was purified by column chromatography on silica gel (10% ethyl acetate/petroleum ether) afforded an orange yellow solid (40% yield). <sup>1</sup>H NMR (400 MHz, CDCl<sub>3</sub>) δ 8.18 (d, *J* = 13.8 Hz, 1H), 8.05 (s, 1H), 8.04 (d, *J* = 13.8 Hz, 1H), 4.00 (s, 3H), 3.96 (s, 3H); <sup>13</sup>C NMR (100 MHz, CDCl<sub>3</sub>): δ 160.15, 153.33, 142.54, 140.01, 129.36, 127.37, 123.96, 122.15, 63.57, 61.71. Anal. Calcd. For C<sub>10</sub>H<sub>9</sub>ClN<sub>2</sub>O<sub>6</sub>: C, 41.61; H, 3.14; N, 9.71; Found: C, 41.79; H, 3.05; N, 9.60.

**(*E*)-5-bromo-2,4-dimethoxy-β-nitrostyrene**

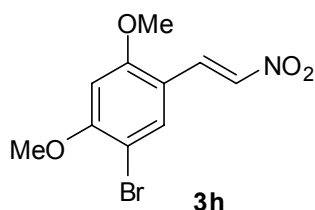

The reaction was performed following the general procedure with Pd(OOCCF<sub>3</sub>)<sub>2</sub> (0.0066 g, 0.02 mmol), Ag<sub>2</sub>CO<sub>3</sub> (0.1103 g, 0.4 mmol), PivOH (0.0512 g, 0.5 mmol) 5-bromo-2,4-dimethoxybenzoic acid (0.0522 g, 0.2 mmol), nitroethane (0.1 mL, 1.4 mmol), DMSO (0.1 mL) and 1,4-dioxane (2.0 ml). The reaction mixture was stirred at 100 °C for 24 h. After extraction and concentration, the reaction mixture was purified by column chromatography on silica gel (10% ethyl acetate/petroleum ether) afforded a yellow solid (73% yield). <sup>1</sup>H NMR (400 MHz, CDCl<sub>3</sub>): δ 8.03 (d, *J* = 13.5 Hz, 1H), 7.76 (d, *J* = 13.5 Hz, 1H), 7.61 (s, 1H), 6.48 (s, 1H), 3.97 (s, 6H); <sup>13</sup>C NMR (100 MHz, CDCl<sub>3</sub>): δ 160.51, 159.83, 136.75, 135.87, 134.06, 113.12, 103.02, 95.98, 56.52, 56.03; Anal. Calcd. For C<sub>10</sub>H<sub>10</sub>BrNO<sub>4</sub>: C, 41.69; H, 3.50; N, 4.86. Found: C, 42.17; H, 3.57; N, 4.64.

**(E)-3-methyl-2-(2-nitro-vinyl)benzofuran**

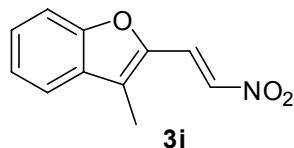

The reaction was performed following the general procedure with Pd(OOCF<sub>3</sub>)<sub>2</sub> (0.0066 g, 0.02 mmol), Ag<sub>2</sub>CO<sub>3</sub> (0.1103 g, 0.4 mmol), PivOH (0.0512 g, 0.5 mmol) 3-methylbenzofuran-2-carboxylic acid (0.0352 g, 0.2 mmol), nitroethane (0.1 mL, 1.4 mmol), DMSO (0.2 mL) and 1,4-dioxane (2.0 mL). The reaction mixture was stirred at 100 °C for 24 h. After extraction and concentration, the reaction mixture was purified by column chromatography on silica gel (pure petroleum ether) afforded an orange-yellow solid (68% yield). <sup>1</sup>H NMR (400 MHz, CDCl<sub>3</sub>): δ 7.97 (d, *J* = 13.0 Hz, 1H), 7.67 (d, *J* = 13.0 Hz, 1H), 7.58 (d, *J* = 7.8 Hz, 1H), 7.48 – 7.44 (m, 2H), 7.34 – 7.27 (m, 1H), 2.44 (s, 3H); <sup>13</sup>C NMR (100 MHz, CDCl<sub>3</sub>): δ 155.40, 144.45, 135.67, 129.32, 128.40, 126.58, 123.89, 123.45, 120.64, 111.57, 8.73; Anal. Calcd. For C<sub>11</sub>H<sub>9</sub>NO<sub>3</sub>: C, 65.02; H, 4.46; N, 6.89, Found: C, 64.63; H, 4.47; N, 6.37.

**(E)-2-(2-nitro-vinyl)-5-(3-(trifluoromethyl)phenyl)furan**

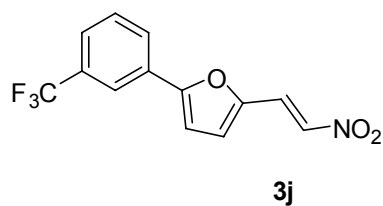

The reaction was performed following the general procedure with Pd(OOCCF<sub>3</sub>)<sub>2</sub> (0.0066 g, 0.02 mmol), Ag<sub>2</sub>CO<sub>3</sub> (0.1103 g, 0.4 mmol), PivOH (0.0512 g, 0.5 mmol) 5-[3-(trifluoromethyl)phenyl]-2-furancarboxylic acid (0.0352 g, 0.2 mmol), nitroethane (0.1 mL, 1.4 mmol), DMSO (0.2 mL) and 1,4-dioxane (2.0 mL). The reaction mixture was stirred at 100 °C for 24 h. After extraction and concentration, the



reaction mixture was purified by column chromatography on silica gel (1% ether /petroleum ether) afforded a orange-yellow solid (25% yield).  $^1\text{H}$  NMR (400 MHz,  $\text{CDCl}_3$ ):  $\delta$  7.96 (s, 1H), 7.92 (d,  $J = 7.7$  Hz, 1H), 7.80 (d,  $J = 13.2$  Hz, 1H), 7.68 – 7.55 (m, 3H), 7.00 (d,  $J = 3.7$  Hz, 1H), 6.92 (d,  $J = 3.7$  Hz, 1H),  $^{19}\text{F}$  NMR (376 MHz,  $\text{CDCl}_3$ ):  $\delta$  -62.93 (s);  $^{13}\text{C}$  NMR (100 MHz,  $\text{CDCl}_3$ ):  $\delta$  156.51, 146.70, 134.87, 131.84, 131.52, 129.80, 129.64, 127.72, 125.79–125.66 (m), 124.94, 122.15, 121.53–121.32 (m), 109.76. Anal. Calcd. For  $\text{C}_{13}\text{H}_8\text{F}_3\text{NO}_3$ : C, 55.13; H, 2.85; N, 4.95. Found: C, 55.27; H, 2.63; N, 4.79.

### **(E)-3-methyl-2-(2-nitrovinyl)benzothiophene**

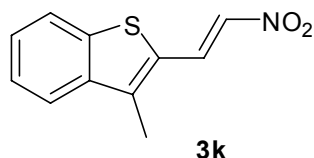

The reaction was performed following the general procedure with  $\text{Pd}(\text{OOC}\text{CF}_3)_2$  (0.0066 g, 0.02 mmol),  $\text{Ag}_2\text{CO}_3$  (0.1103 g, 0.4 mmol), PivOH (0.0512 g, 0.5 mmol) 3-methylbenzo[*b*]thiophene-2-carboxylic acid (0.0384 g, 0.2 mmol), nitroethane (0.1 mL, 1.4 mmol), DMSO (0.1 mL) and 1,4-dioxane (2.0 mL). The reaction mixture was stirred at 110 °C for 24 h. After extraction and concentration, the reaction mixture was purified by column chromatography on silica gel (1% ether/petroleum ether) afforded a yellow solid (67% yield).  $^1\text{H}$  NMR (400 MHz,  $\text{CDCl}_3$ ):  $\delta$  8.40 (d,  $J = 13.2$  Hz, 1H), 7.86–7.72 (m, 2H), 7.52–7.39 (m, 3H), 2.59 (s, 3H);  $^{13}\text{C}$  NMR (100 MHz,  $\text{CDCl}_3$ ):  $\delta$  141.61, 140.00, 139.92, 136.38, 130.83, 128.20, 127.97, 125.06, 123.37, 122.65, 12.52. Anal. Calcd. for  $\text{C}_{11}\text{H}_9\text{NO}_2\text{S}$ : C, 60.26; H, 4.14; N, 6.39; Found: C, 59.94; H, 3.73; N, 6.06.

### **(E)-3-chloro-2-(2-nitrovinyl)benzothiophene**

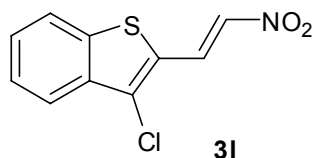

The reaction was performed following the general procedure with Pd(OOCCF<sub>3</sub>)<sub>2</sub> (0.0066 g, 0.02 mmol), Ag<sub>2</sub>CO<sub>3</sub> (0.1103 g, 0.4 mmol), 3-chlorobenzo[b]thiophene-2-carboxylic acid (0.0425 g, 0.2 mmol), nitroethane (0.1 mL, 1.4 mmol), DMSO (0.1 mL) and 1,4-dioxane (2.0 mL). The reaction mixture was stirred at 110 °C for 24 h. After extraction and concentration, the reaction mixture was purified by column chromatography on silica gel (2% ethyl acetate/petroleum ether) afforded a yellow solid (64% yield). <sup>1</sup>H NMR (400 MHz, CDCl<sub>3</sub>): δ 8.36 (d, *J* = 13.5 Hz, 1H), 7.89 – 7.85 (m, 1H), 7.80 – 7.77 (m, 1H), 7.55 – 7.46 (m, 3H); <sup>13</sup>C NMR (100 MHz, CDCl<sub>3</sub>): δ 137.96, 137.63, 136.44, 129.52, 129.03, 128.73, 126.85, 125.96, 123.26, 122.78. Anal. Calcd. for C<sub>10</sub>H<sub>6</sub>ClNO<sub>2</sub>S: C, 50.11; H, 2.52; N, 5.84; Found: C, 50.21; H, 2.51; N, 5.64.

#### **(*E*)-2,6-difluoro-β-nitrostyrene**

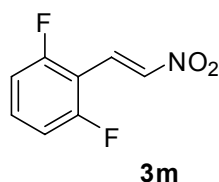

The reaction was performed following the general procedure with Pd(CH<sub>3</sub>CN)<sub>2</sub>Cl<sub>2</sub> (0.0104 g, 0.04 mmol), Ag<sub>2</sub>CO<sub>3</sub> (0.1103 g, 0.4 mmol), 2,6-Difluorobenzoic acid (0.0316 g, 0.2 mmol), nitroethane (0.1 mL, 1.4 mmol), DMSO (0.04 mL) and 1,4-dioxane (2.0 mL). The reaction mixture was stirred at 110 °C for 24 h. After extraction and concentration, the reaction mixture was purified by column chromatography on silica gel (5% ether /petroleum ether) afforded a orange-yellow solid (63% yield). This compound is known.<sup>4</sup> <sup>1</sup>H NMR (400 MHz, CDCl<sub>3</sub>): δ 8.14 (d, *J* = 13.9 Hz, 1H), 7.84 (d, *J* = 13.9 Hz, 1H), 7.50 – 7.41 (m, 1H), 7.03 (t, *J* = 8.7 Hz,

2H);  $^{19}\text{F}$  NMR (376 MHz,  $\text{CDCl}_3$ ):  $\delta$  -107.06 (s);  $^{13}\text{C}$  NMR (100MHz,  $\text{CDCl}_3$ ):  $\delta$  162.13 (d,  $J = 6.2$  Hz), 159.57 (d,  $J = 6.2$  Hz), 140.15 (t,  $J = 10.3$  Hz), 132.50 (t,  $J = 11.2$  Hz), 124.32 (t,  $J = 2.4$  Hz), 111.09-111.35 (m), 107.67 (t,  $J = 15.5$  Hz).

### (E)-2,3,6-trifluoro- $\beta$ -nitrostyrene

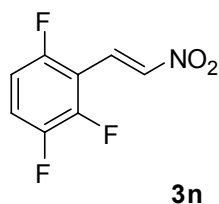

The reaction was performed following the general procedure with  $\text{Pd}(\text{CH}_3\text{CN})_2\text{Cl}_2$  (0.0104 g, 0.04 mmol),  $\text{Ag}_2\text{CO}_3$  (0.1103 g, 0.4 mmol), 2,4,6-trifluorobenzoic acid (0.0352 g, 0.2 mmol), nitroethane (0.1 mL, 1.4 mmol), DMSO (0.04 mL) and 1,4-dioxane (2.0 mL). The reaction mixture was stirred at 110 °C for 24 h. After extraction and concentration, the reaction mixture was purified by column chromatography on silica gel (5% ether /petroleum ether) afforded an orange-yellow solid (60% yield).  $^1\text{H}$  NMR (400 MHz,  $\text{CDCl}_3$ ):  $\delta$  8.11 (d,  $J = 14.0$  Hz, 1H), 7.86 (d,  $J = 14.0$  Hz, 1H), 7.36 – 7.26 (m, 1H), 7.04 – 6.96 (m, 1H);  $^{19}\text{F}$  NMR (376 MHz,  $\text{CDCl}_3$ ):  $\delta$  -112.24 (d,  $J = 15.5$  Hz), -130.75 (d,  $J = 19.9$  Hz), -140.33 (dd,  $J = 19.9$ , 15.3 Hz);  $^{13}\text{C}$  NMR (100 MHz,  $\text{CDCl}_3$ ):  $\delta$  157.28 – 157.11 (m), 154.78 – 154.58 (m), 149.84 – 149.52 (m), 147.65 – 147.42 (m), 147.27 – 146.94 (m), 145.18 – 144.94 (m), 140.90 (t,  $J = 10.1$  Hz), 123.67 – 123.49 (m), 119.40 – 118.99 (m), 110.93 – 110.45 (m), 109.52 – 109.02 (m). Anal. Calcd. for  $\text{C}_8\text{H}_4\text{F}_3\text{NO}_2$ : C, 47.31; H, 1.98; N, 6.90 ; Found: C, 47.22; H, 2.24; N, 6.87.

### (E)-4-methoxy-2-nitro- $\beta$ -nitrostyrene

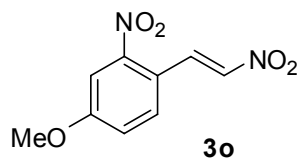

The reaction was performed following the general procedure with Pd(CH<sub>3</sub>CN)<sub>2</sub>Cl<sub>2</sub> (0.0104 g, 0.04 mmol), Ag<sub>2</sub>CO<sub>3</sub> (0.1103 g, 0.4 mmol), 4-methoxy-2-nitrobenzoic acid (0.0394 g, 0.2 mmol), nitroethane (0.1 mL, 1.4 mmol), DMSO (0.04 mL) and 1,4-dioxane (2.0 mL). The reaction mixture was stirred at 130 °C for 24h. After extraction and concentration, the reaction mixture was purified by column chromatography on silica gel (20% ethyl acetate/petroleum ether) afforded a light-yellow solid (53% yield). <sup>1</sup>H NMR (400 MHz, Acetone): δ 8.40 (d, *J* = 13.5 Hz, 1H), 7.97 (d, *J* = 8.8 Hz, 1H), 7.88 (d, *J* = 13.5 Hz, 1H), 7.69 (d, *J* = 2.6 Hz, 1H), 7.41 (dd, *J* = 8.8, 2.6 Hz, 1H), 4.02 (s, 3H); <sup>13</sup>C NMR (100 MHz, Acetone): δ 205.29, 162.41, 139.03, 134.17, 131.06, 119.79, 117.43, 110.42, 56.01. Anal. Calcd. for C<sub>9</sub>H<sub>8</sub>N<sub>2</sub>O<sub>5</sub>: C, 48.22; H, 3.60; N, 12.50; Found: C, 48.99; H, 3.67; N, 12.02.

#### **((E)-1-Methyl-2-nitro-vinyl)-2,4-dimethoxybenzene**

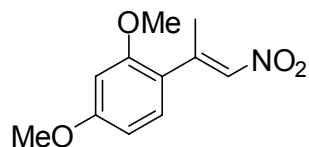

The reaction was performed following the general procedure with Pd(OOCCF<sub>3</sub>)<sub>2</sub> (0.0066 g, 0.02 mmol), Ag<sub>2</sub>CO<sub>3</sub> (0.1103 g, 0.4 mmol), PivOH (0.0512 g, 0.5 mmol), 2,4-dimethoxybenzoic acid (0.0364 g, 0.2 mmol), 1-nitropropane (0.125 mL, 1.4 mmol), DMSO (0.2 mL) and 1,4-dioxane (2 mL). The reaction mixture was stirred at 100 °C for 24 h. After extraction and concentration, the reaction mixture was purified by column chromatography on silica gel (10% ether /petroleum ether) afforded a yellow solid (15% yield). <sup>1</sup>H NMR (400 MHz, CDCl<sub>3</sub>) δ 7.21 (d, *J* = 1.1 Hz, 1H), 7.12 (d, *J* = 9.1 Hz, 1H), 6.50 (m, 2H), 3.84 (s, 3H), 3.83 (s, 3H), 2.55 (d, *J* = 1.1 Hz,

3H).  $^{13}\text{C}$  NMR (100MHz,  $\text{CDCl}_3$ )  $\delta$  162.25, 158.15, 149.62, 137.18, 129.90, 120.73, 104.59, 99.20, 55.55, 55.50, 19.97.

**((Z)-1-Methyl-2-nitro-vinyl)-2,4-dimethoxybenzene**

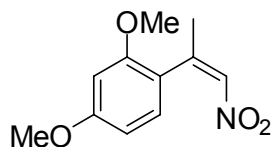

The reaction was performed following the general procedure with  $\text{Pd}(\text{OOC}(\text{CF}_3)_2)_2$  (0.0066 g, 0.02 mmol),  $\text{Ag}_2\text{CO}_3$  (0.1103 g, 0.4 mmol), PivOH (0.0512 g, 0.5 mmol), 2,4-dimethoxybenzoic acid (0.0364 g, 0.2 mmol), 1-nitropropane (0.125 mL, 1.4 mmol), DMSO (0.2 mL) and 1,4-dioxane (2 mL). The reaction mixture was stirred at 100 °C for 24 h. After extraction and concentration, the reaction mixture was purified by column chromatography on silica gel (10% ether /petroleum ether) afforded a yellow solid (9 % yield).  $^1\text{H}$  NMR (400 MHz,  $\text{CDCl}_3$ )  $\delta$  7.07 (d,  $J = 1.1$  Hz, 1H), 7.01 (d,  $J = 8.4$  Hz, 1H), 6.52 (dd,  $J = 8.4$  Hz, 2.3 Hz, 1H), 6.48 (d,  $J = 2.3$  Hz, 1H), 3.83 (s, 3H), 3.76 (s, 3H), 2.14 (d,  $J = 1.1$  Hz, 3H).  $^{13}\text{C}$  NMR (100 MHz,  $\text{CDCl}_3$ )  $\delta$  161.33, 156.60, 144.39, 135.03, 128.04, 118.68, 104.45, 98.65, 55.24, 55.18, 23.04.

## References:

- (1) Buechi, G.; Mak, C.-P. *J. Org. Chem.* **1977**, *42*, 1784.
- (2) Rao, A. S.; Srinivas, P. V.; Babu, S.; Rao, J. M. *Tetrahedron Lett.* **2005**, *46*, 8141.
- (3) Gore, M. P.; Gould, S. J.; Weller, D. D. *J. Org. Chem.* **1992**, *57*, 2774.
- (4) Jacobo, R.; Cota, A.; Rogel, E.; Garcia, J. D.; Rivero, I. A.; Hellberg, L. H.; Somanathan, R. *J. Fluorine Chem.* **1994**, *67*, 253.

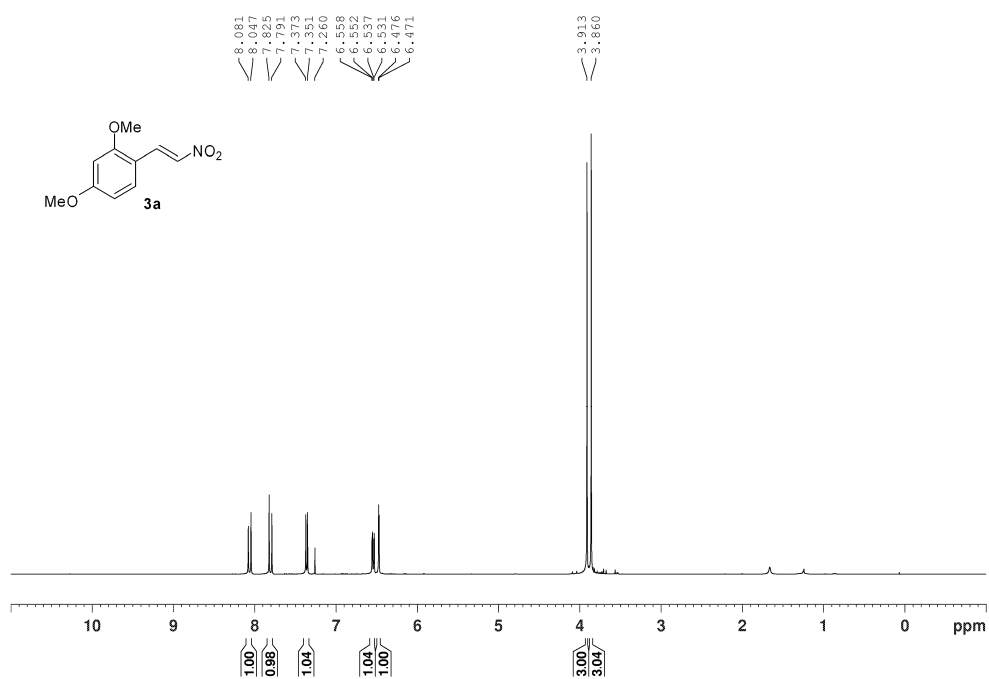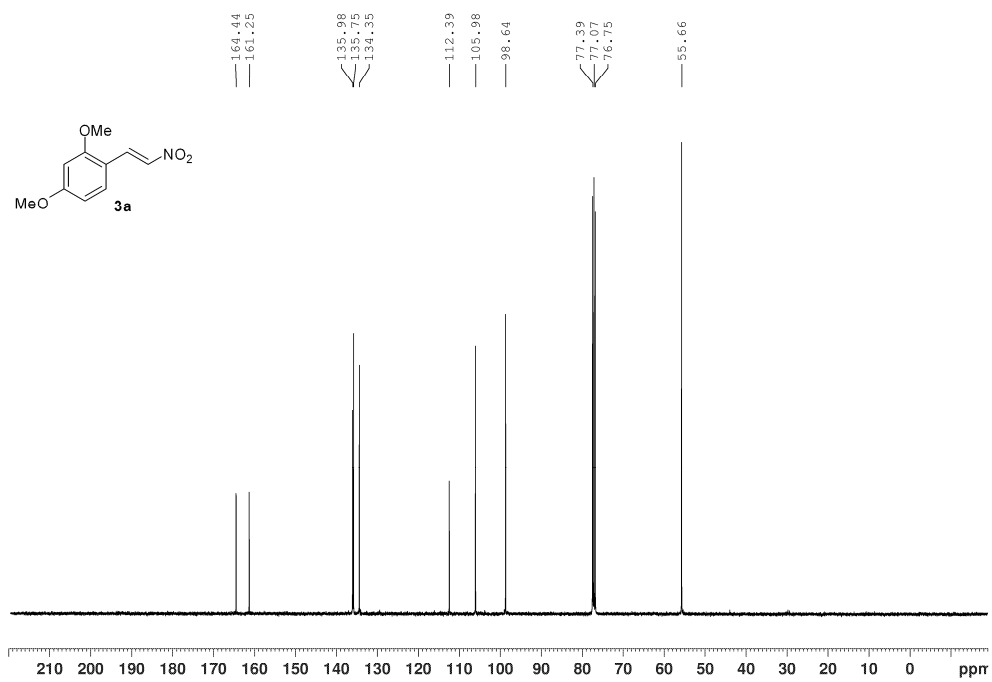

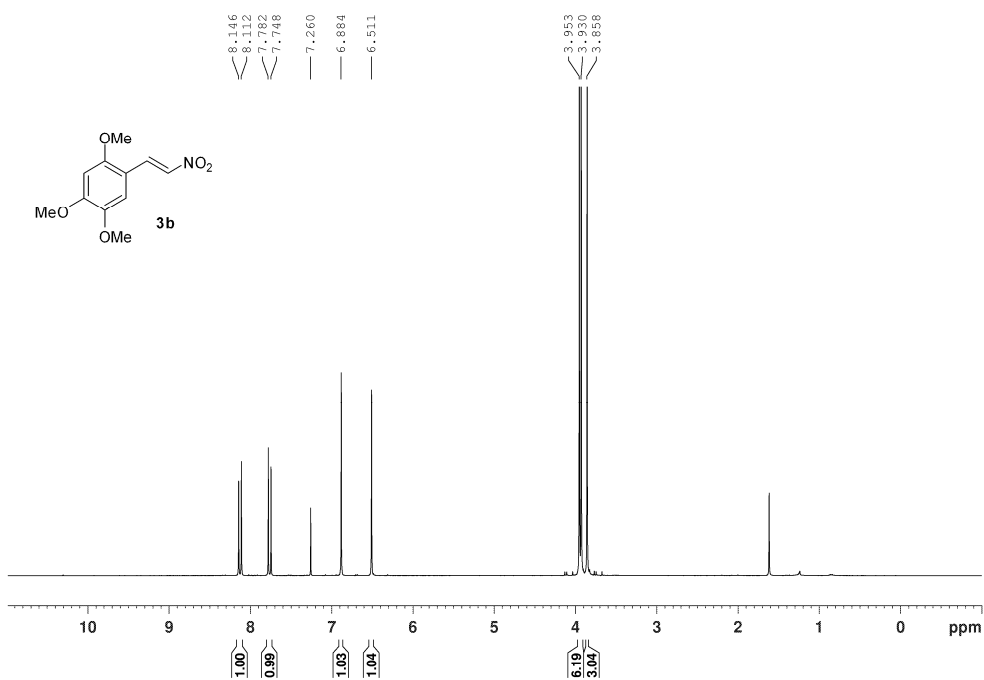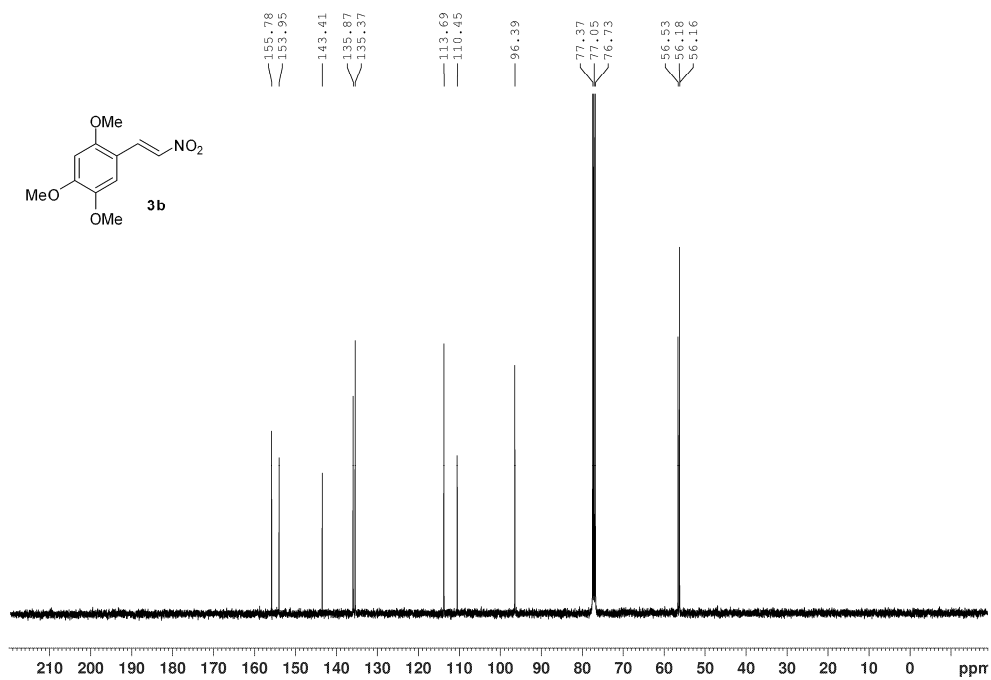



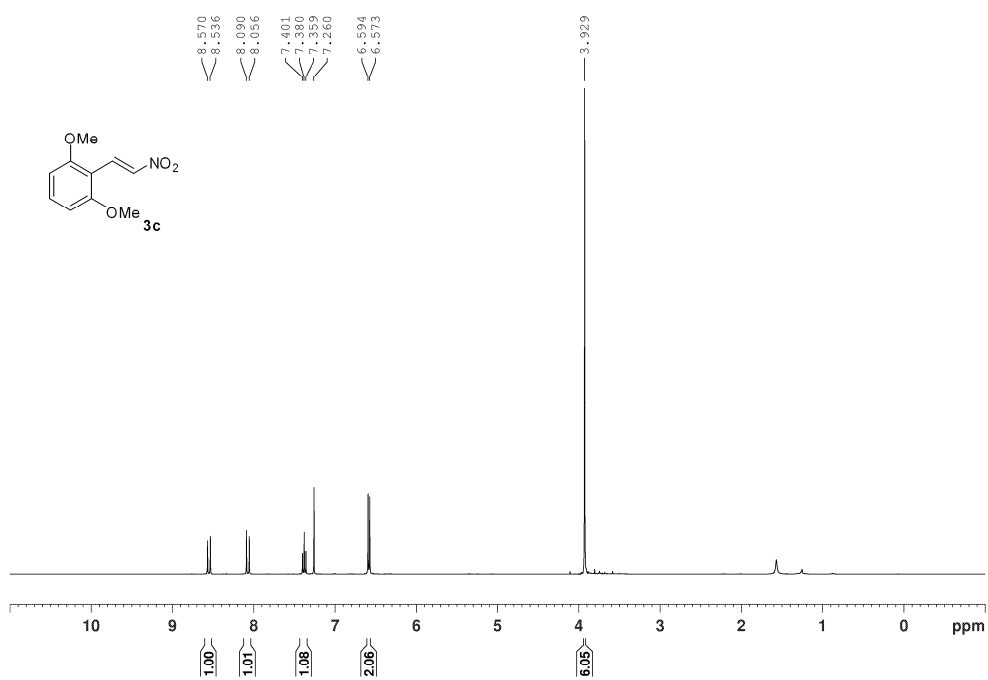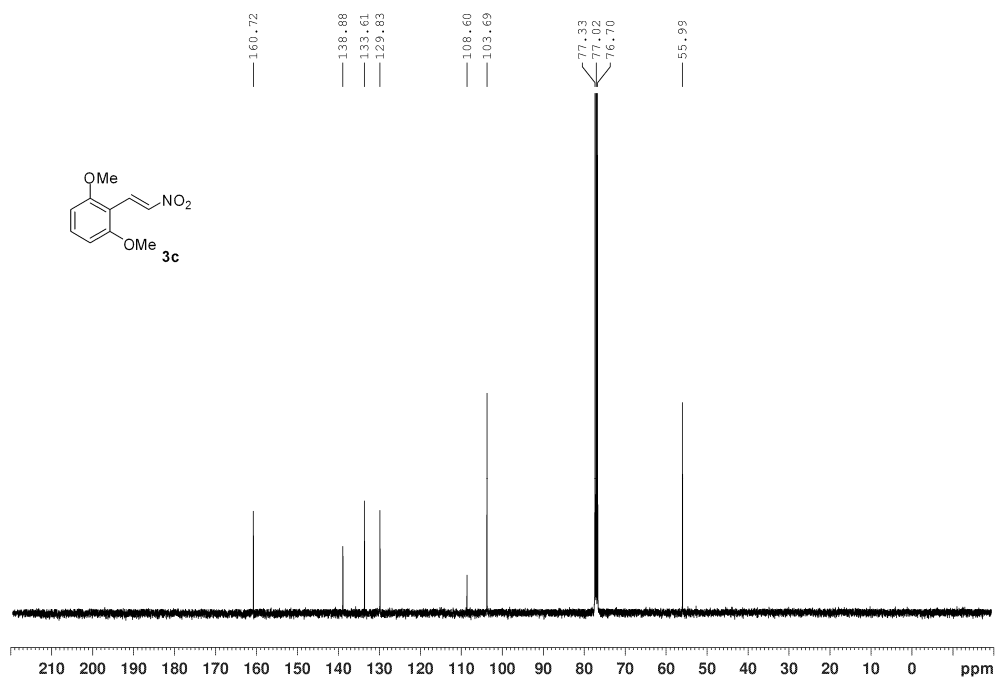

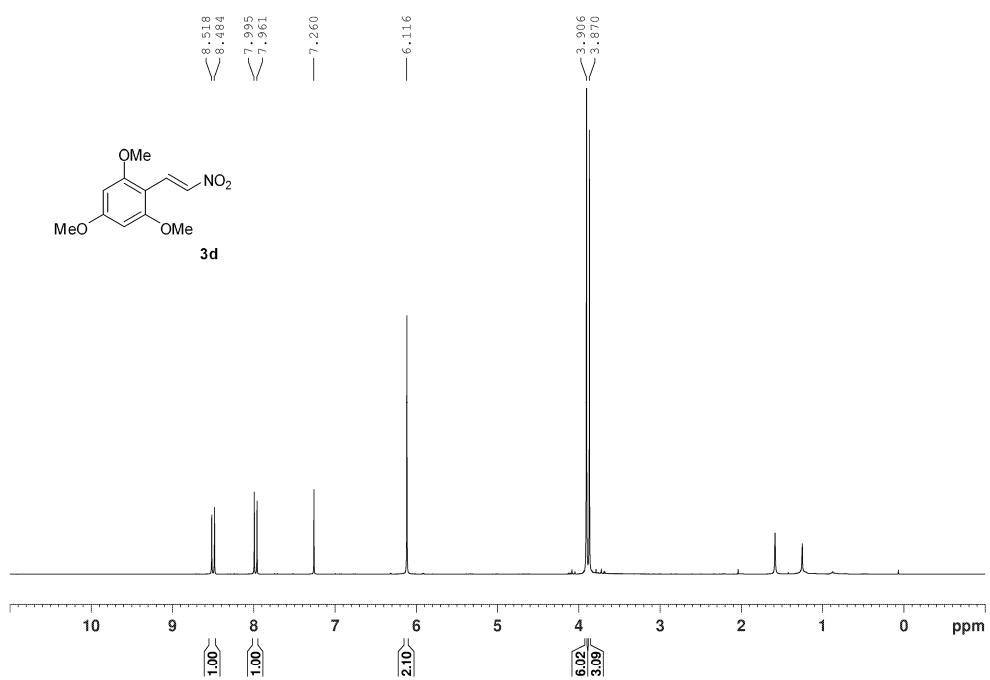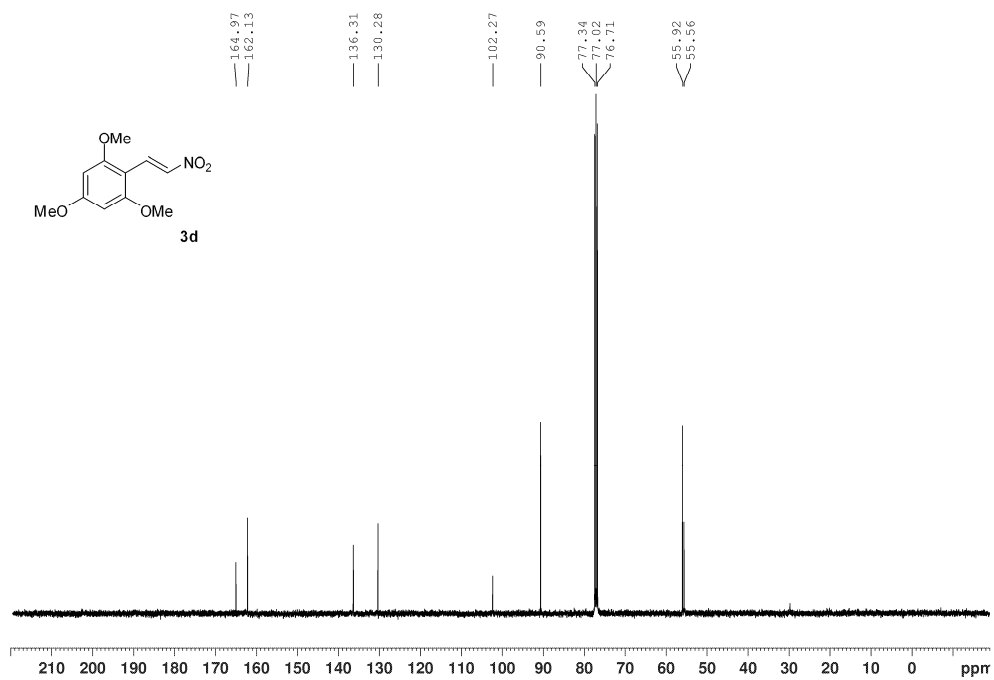

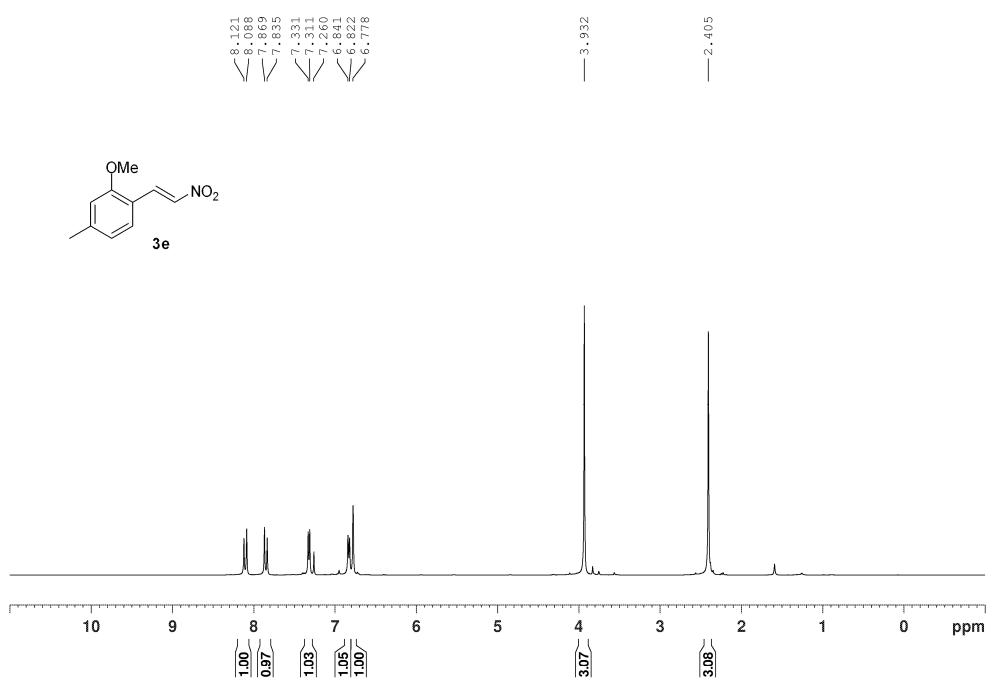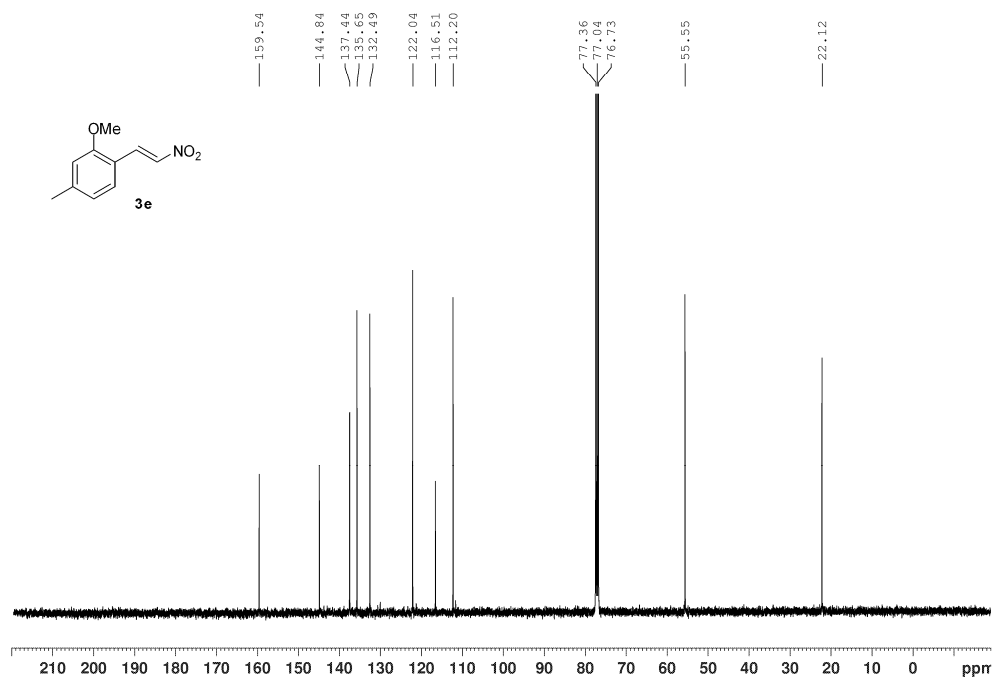

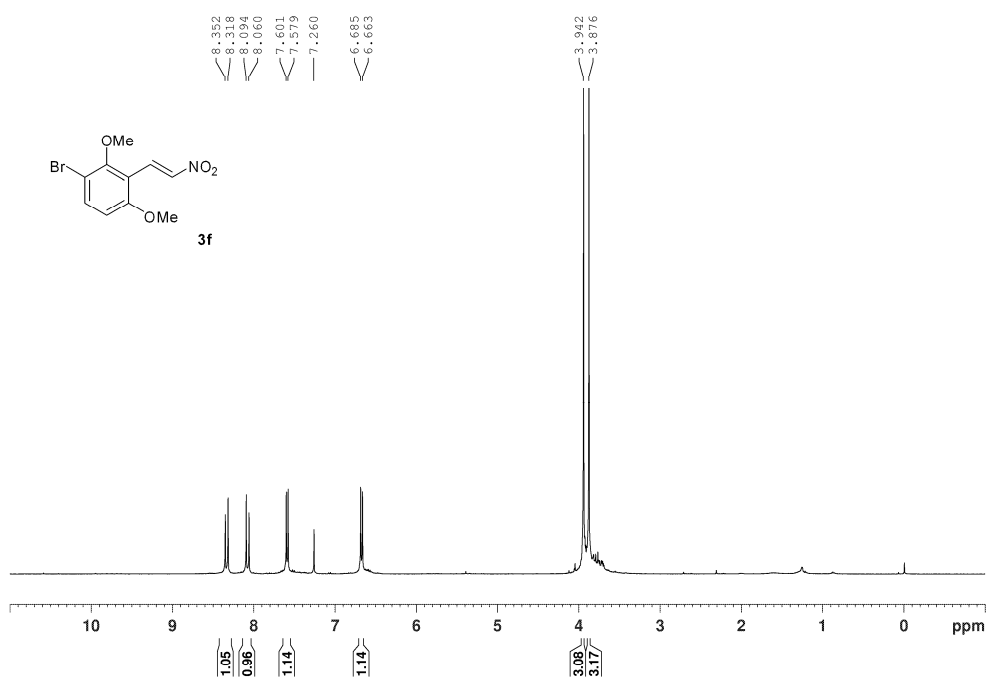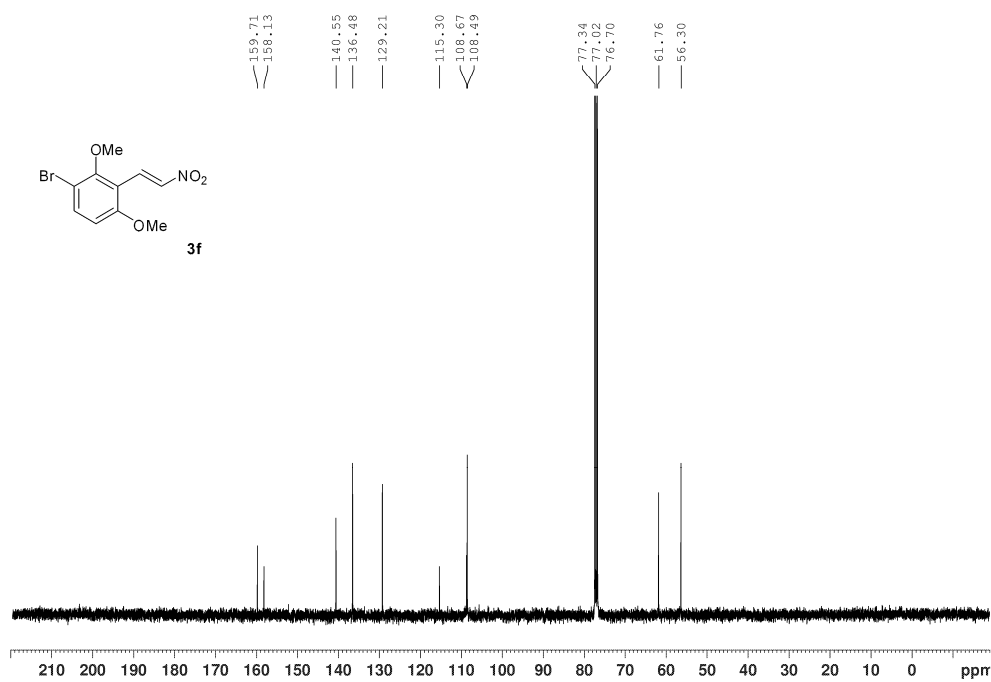

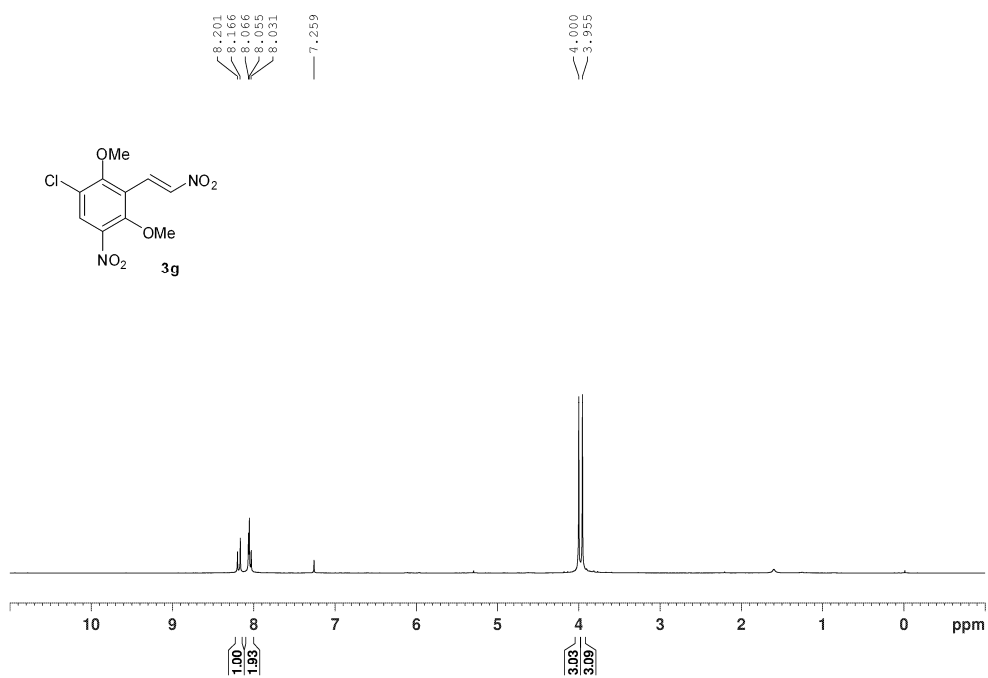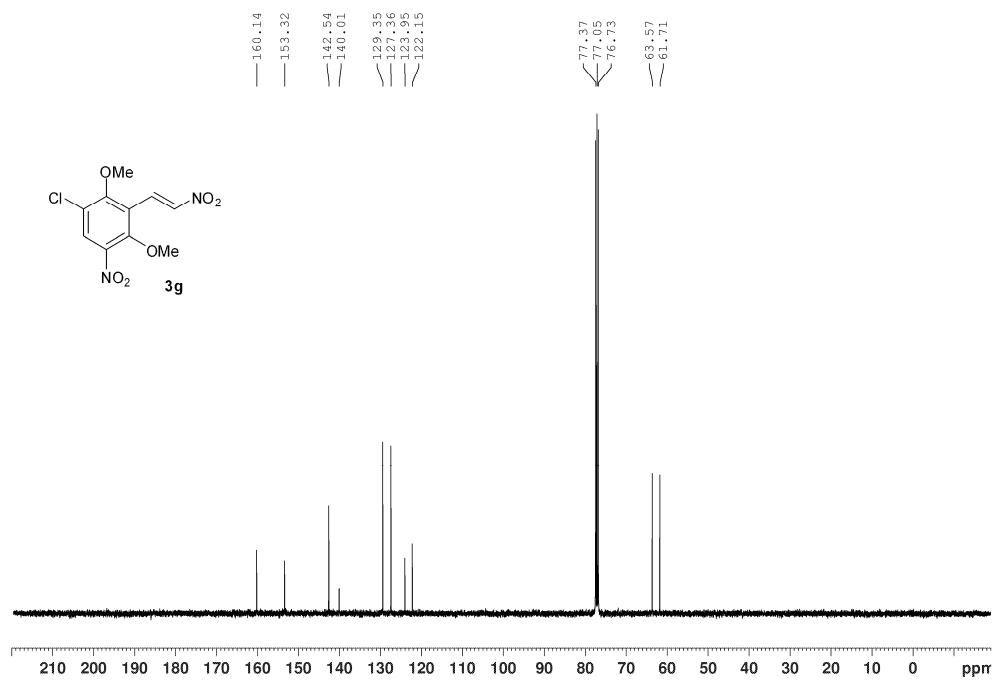

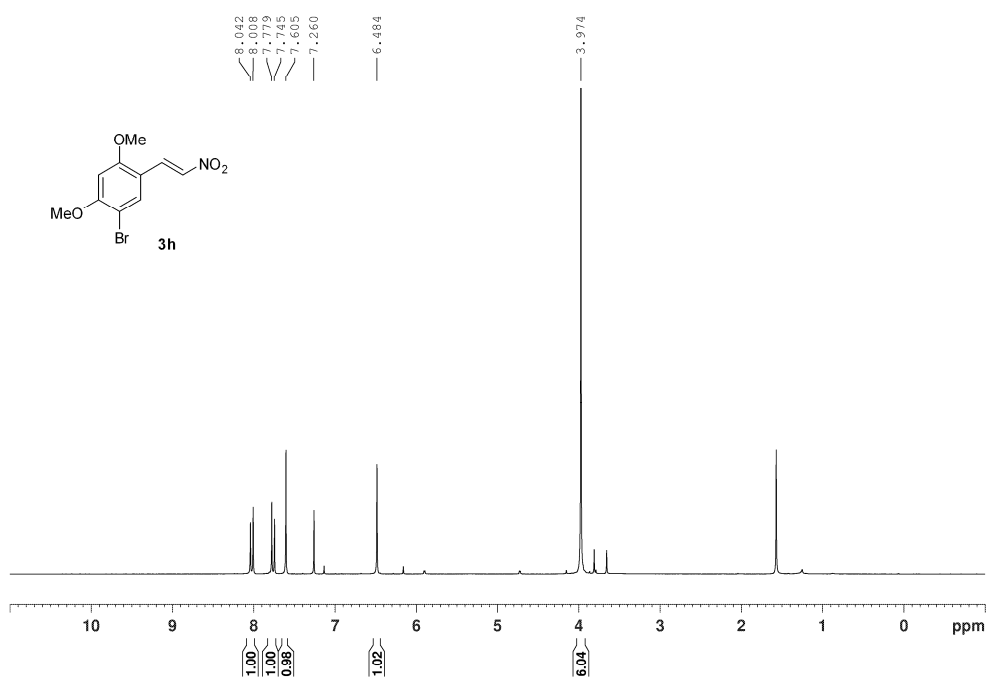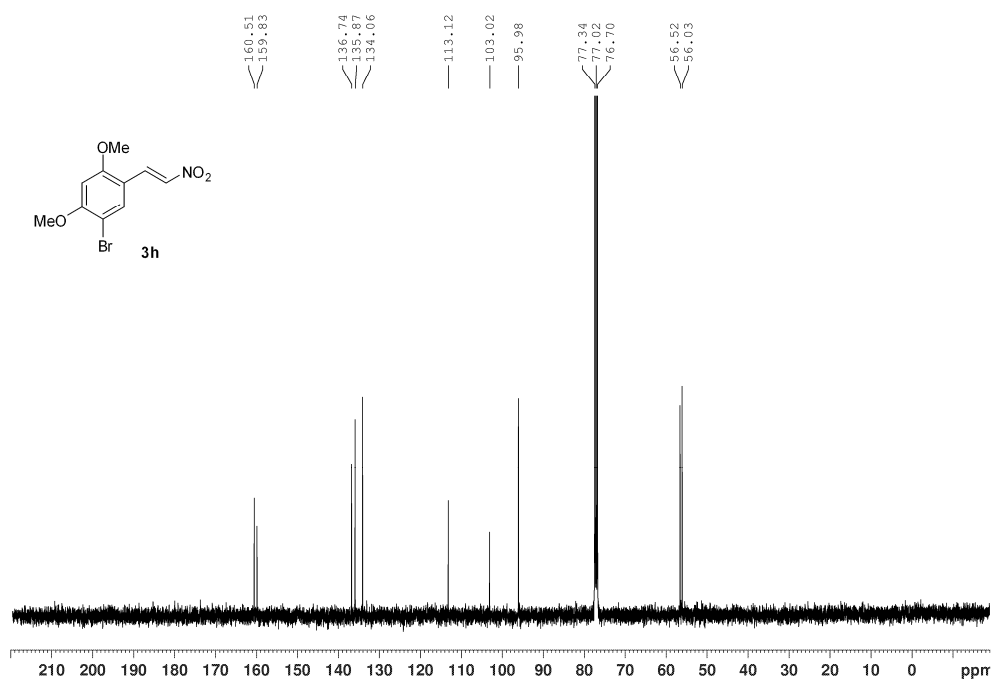

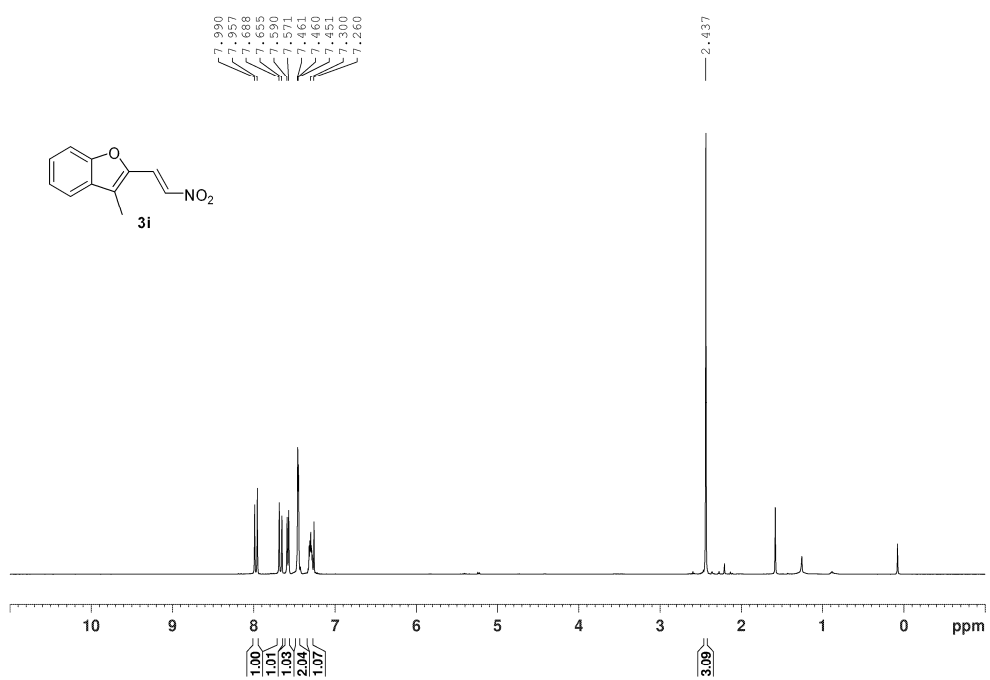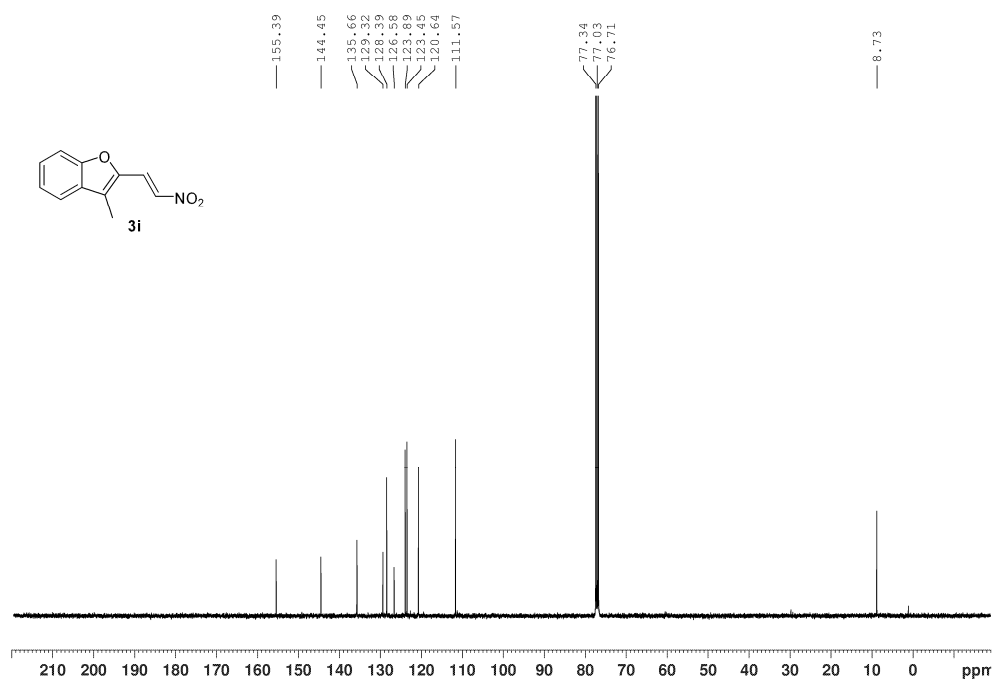

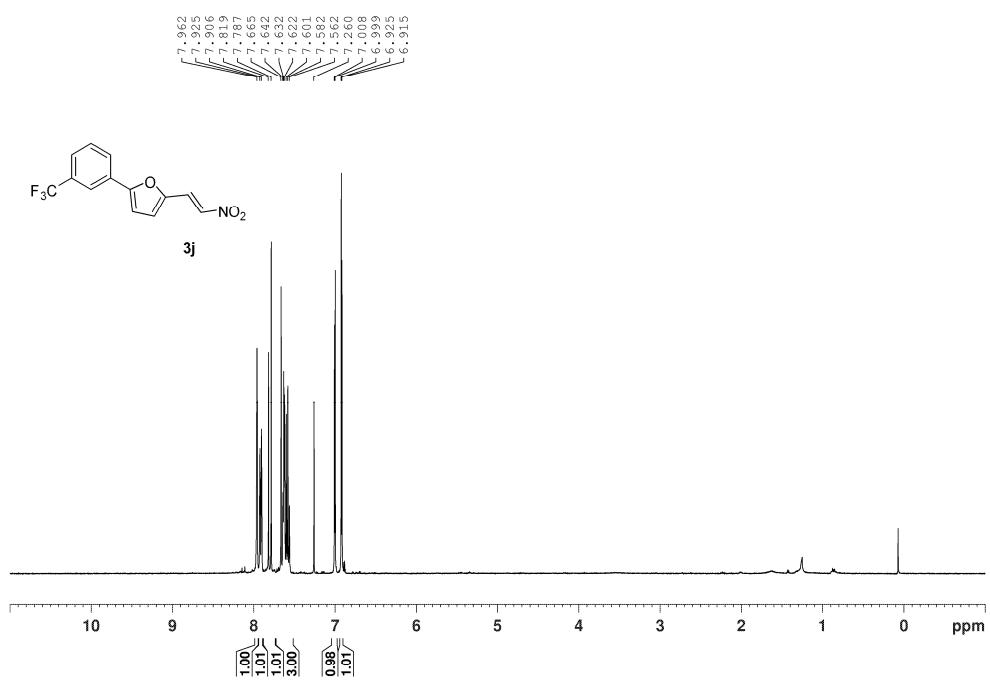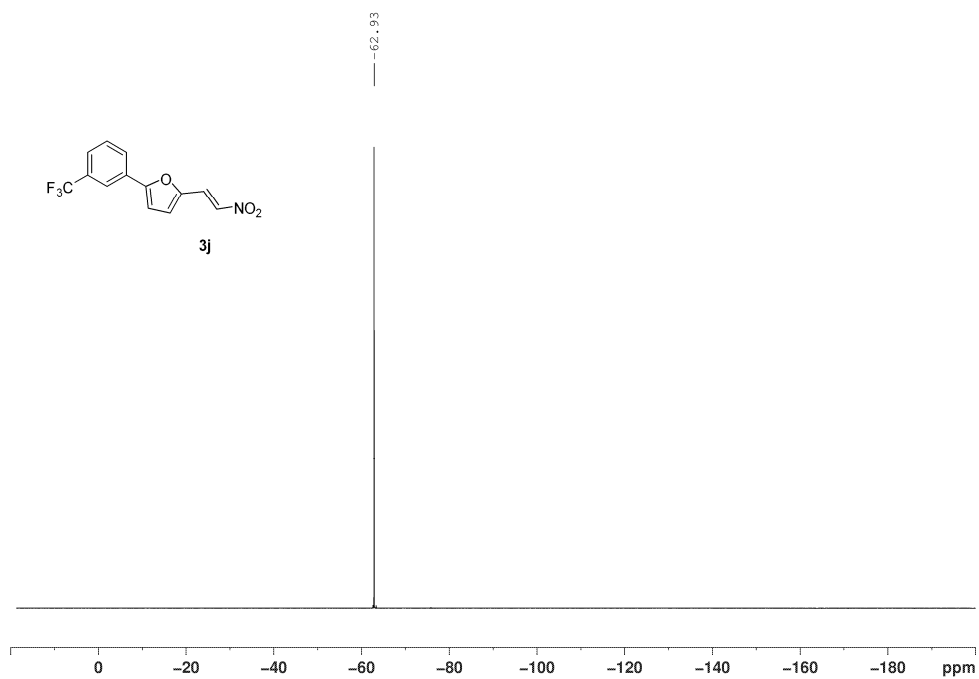



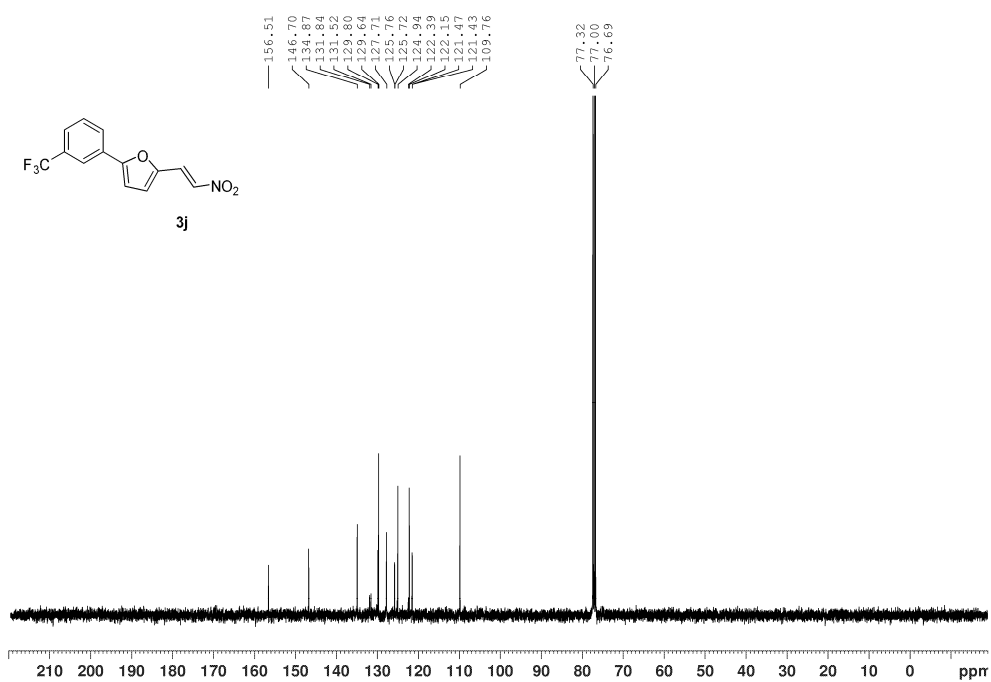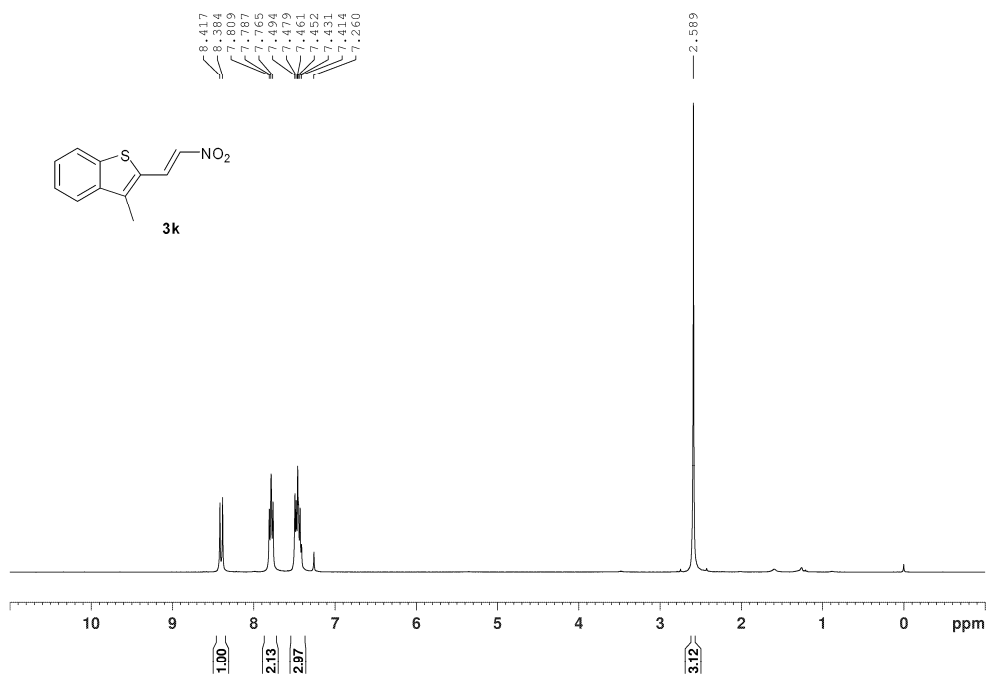

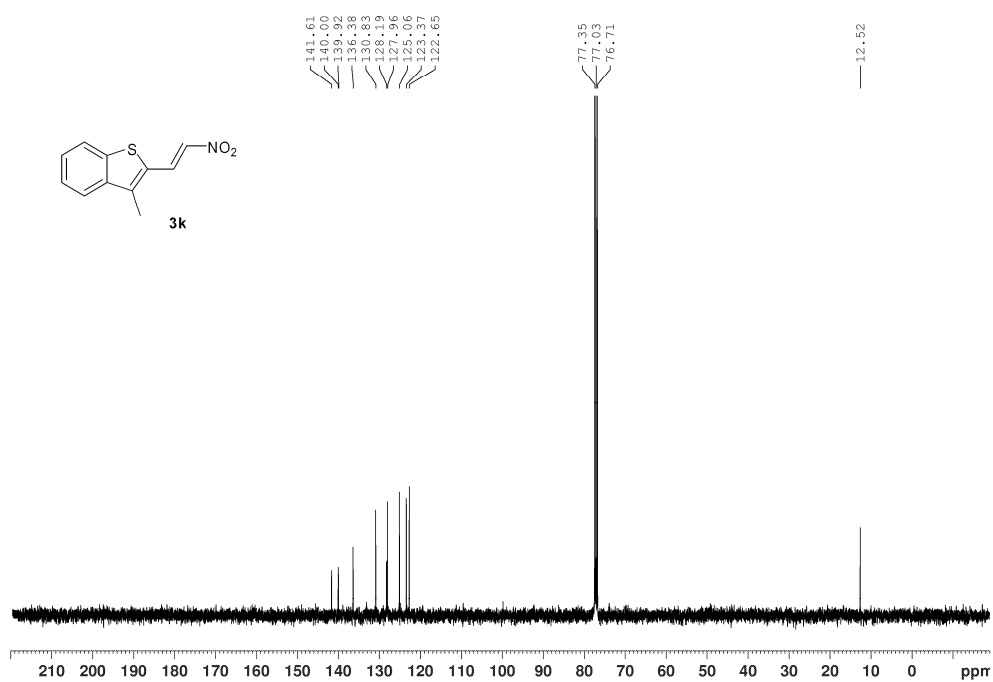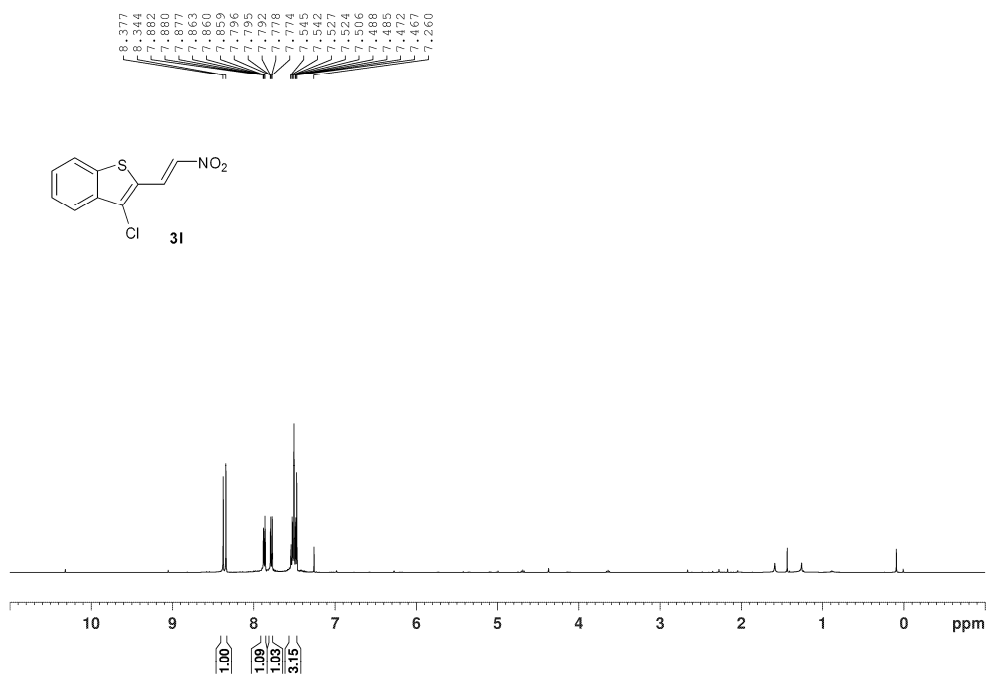

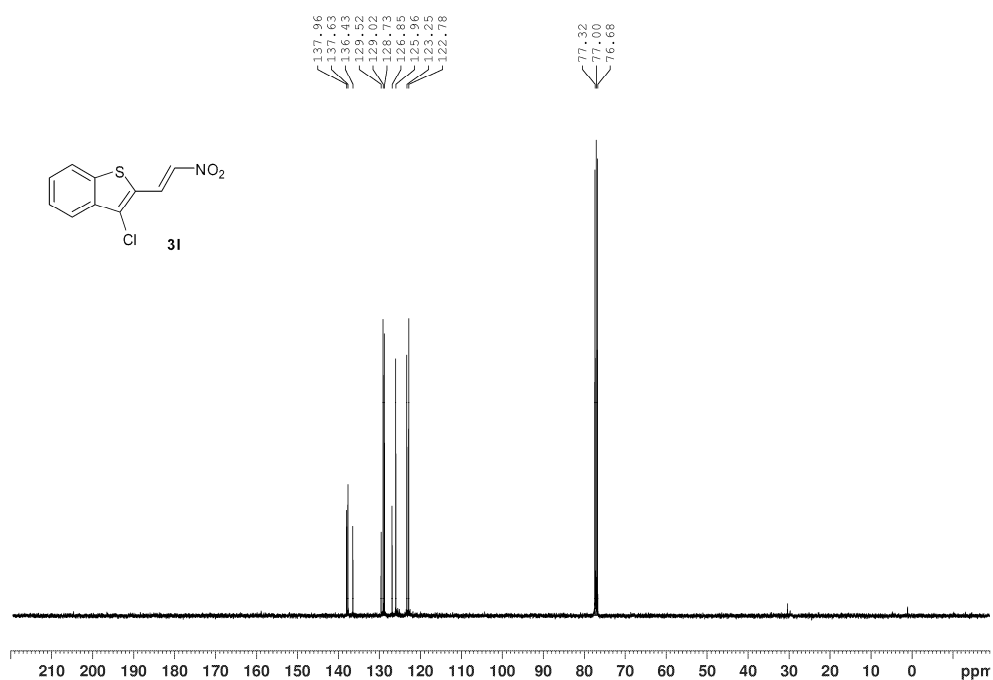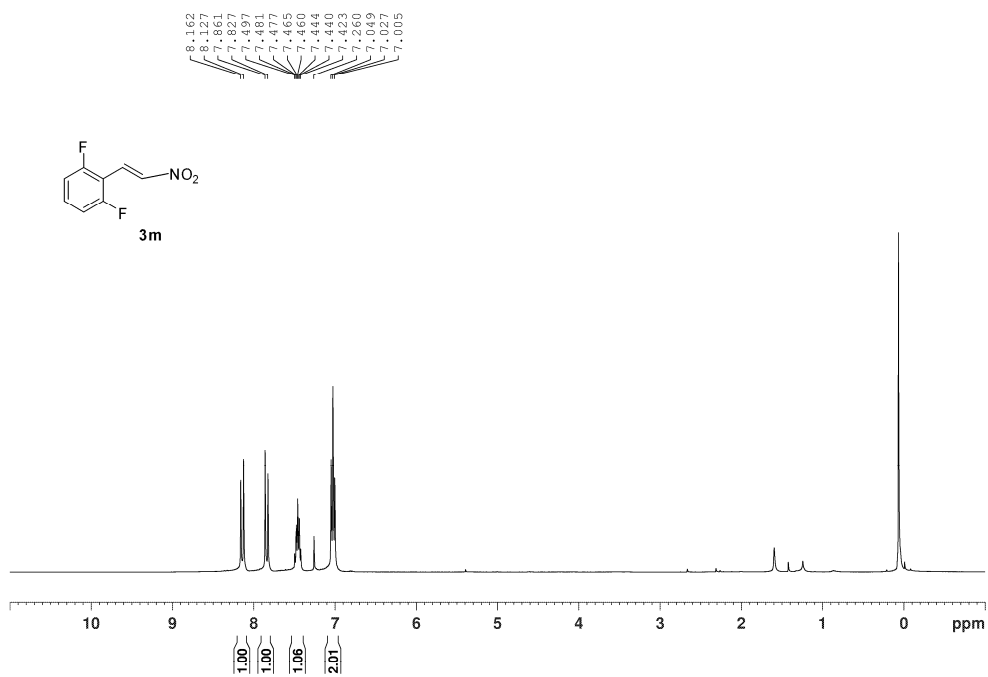

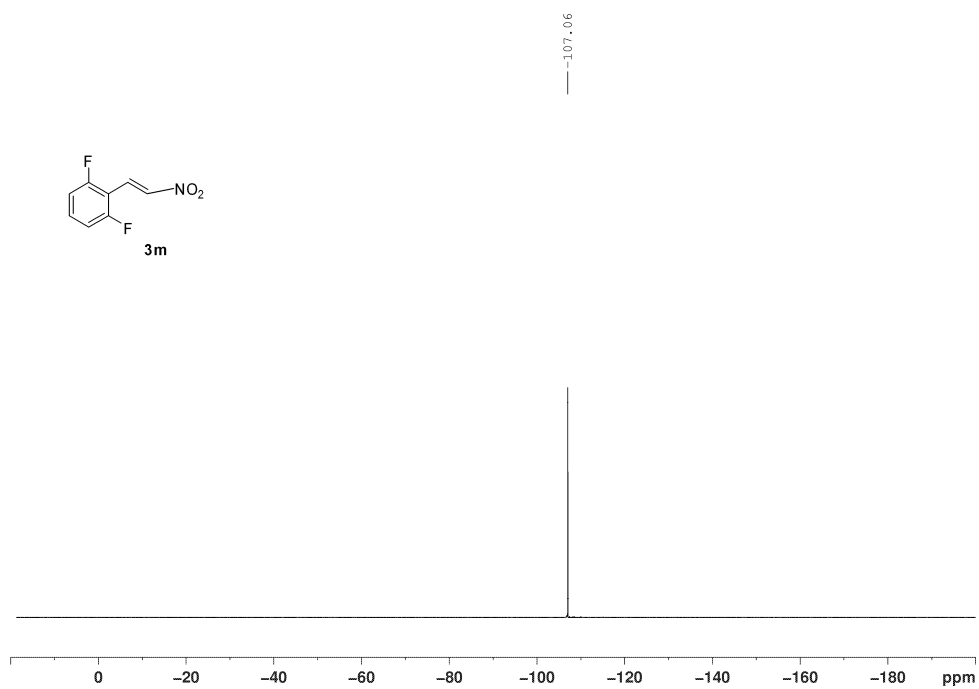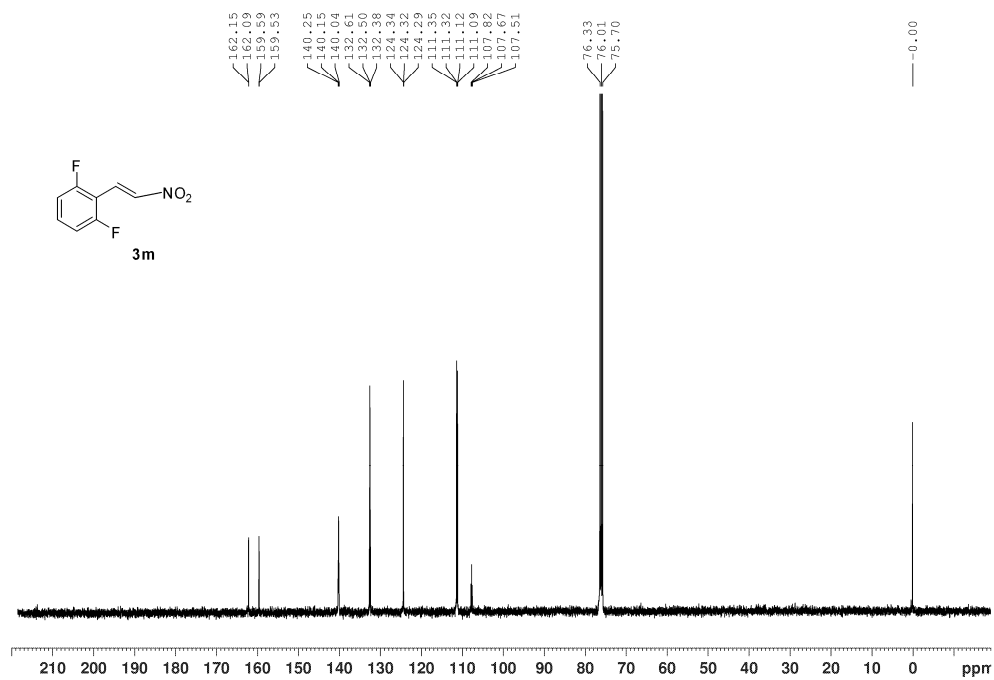



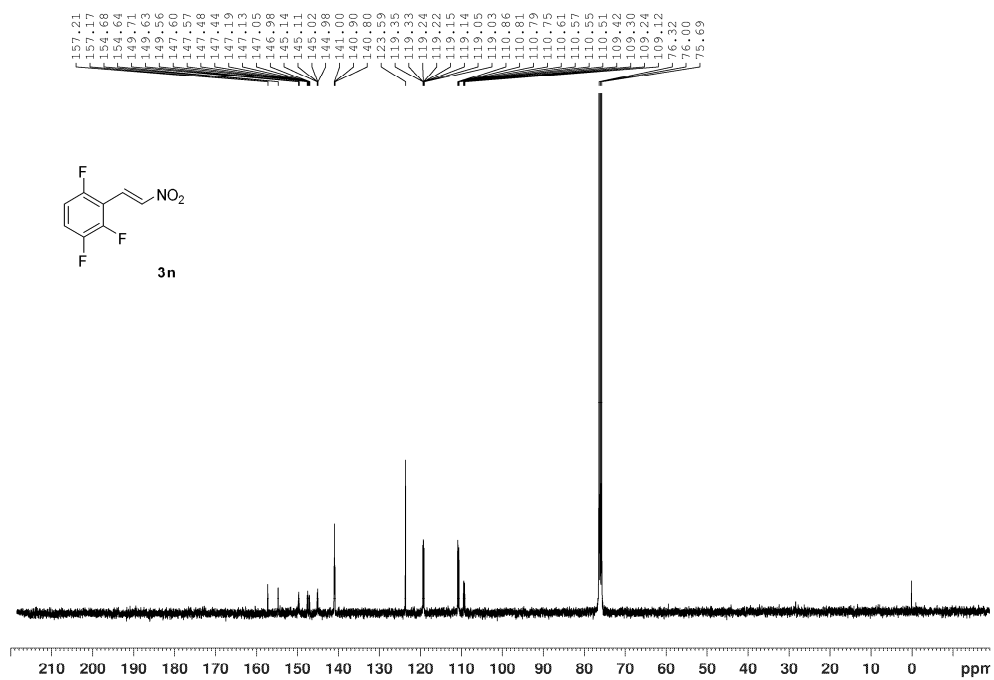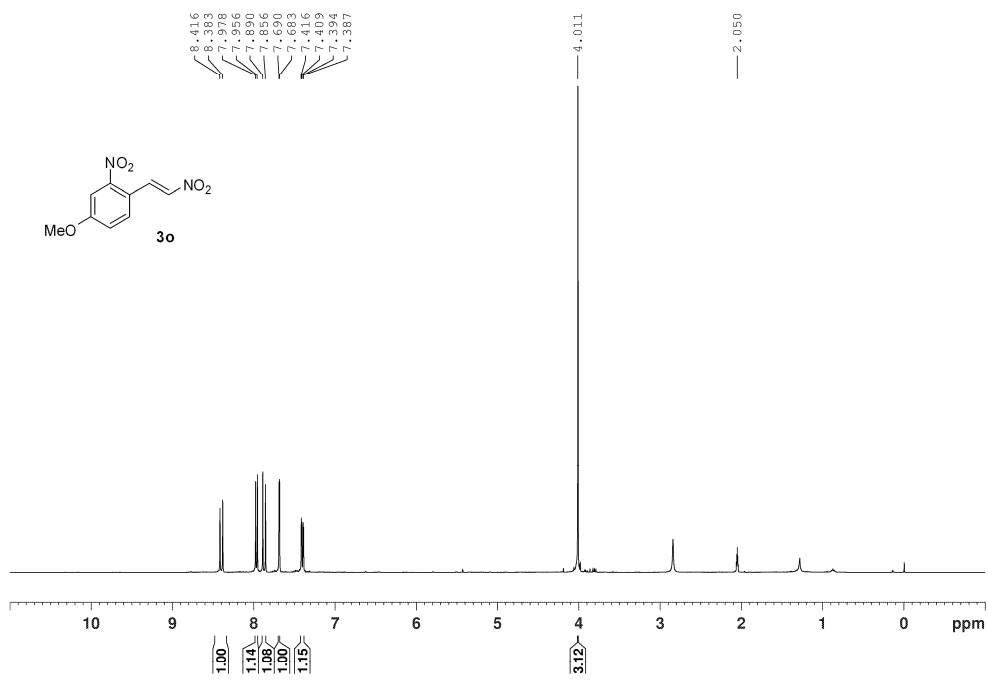

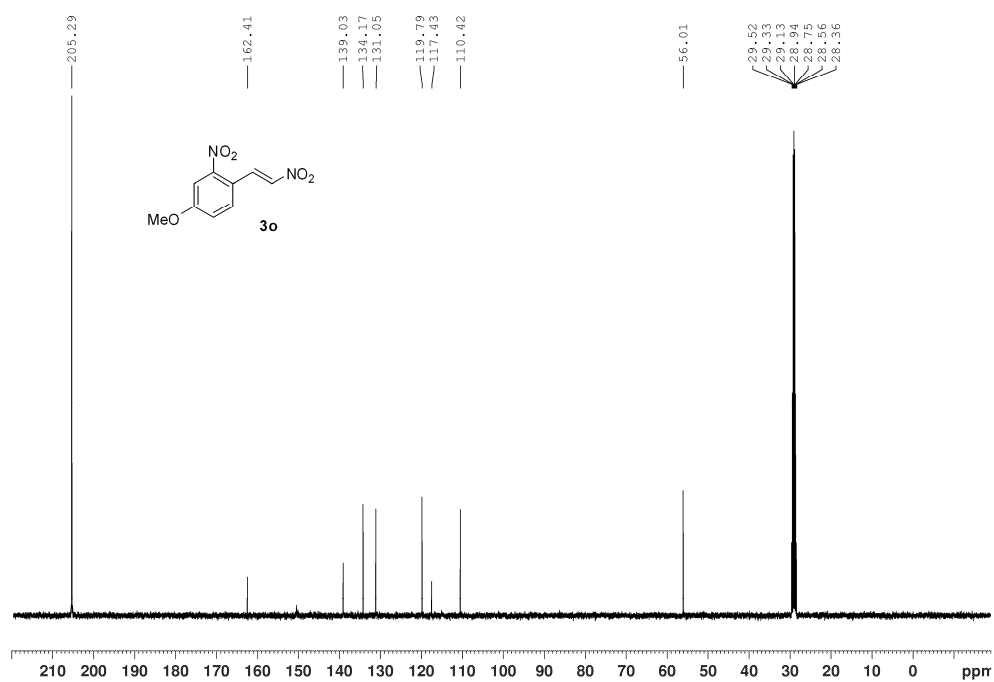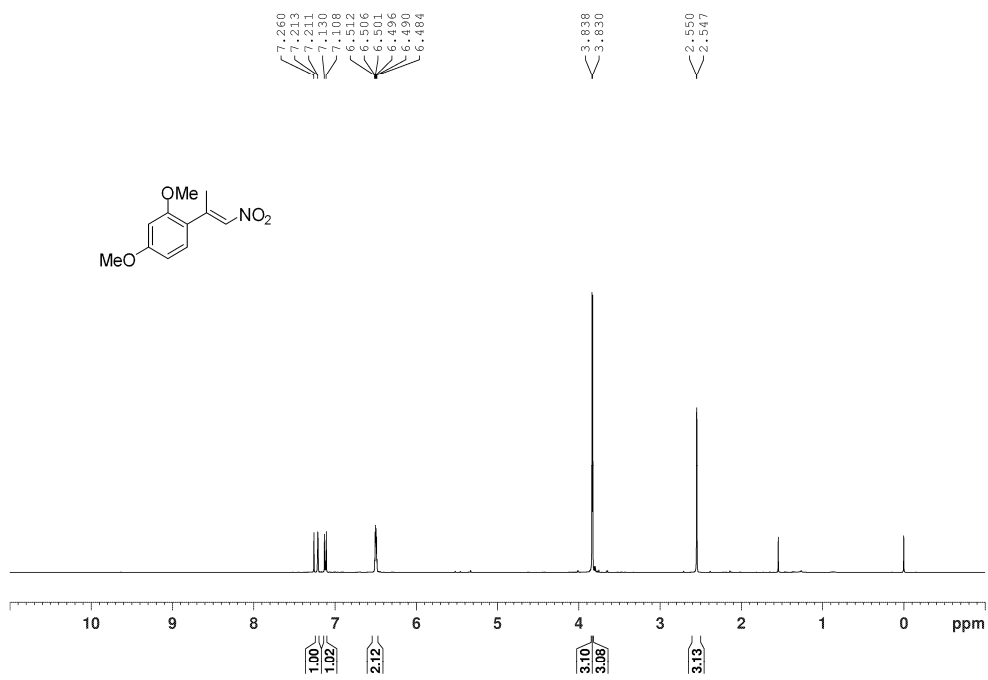

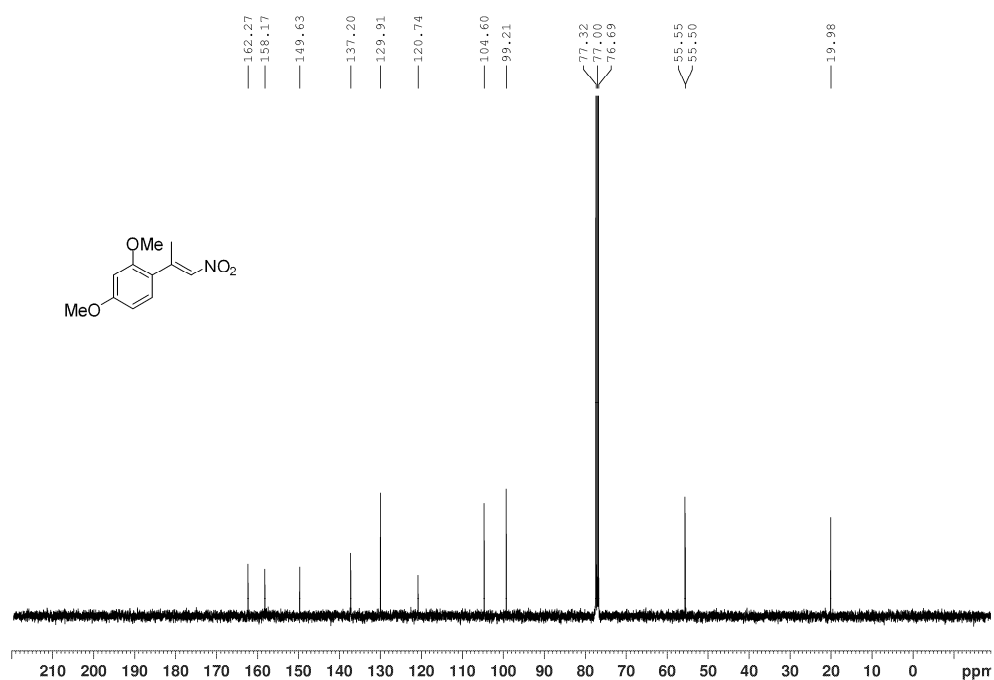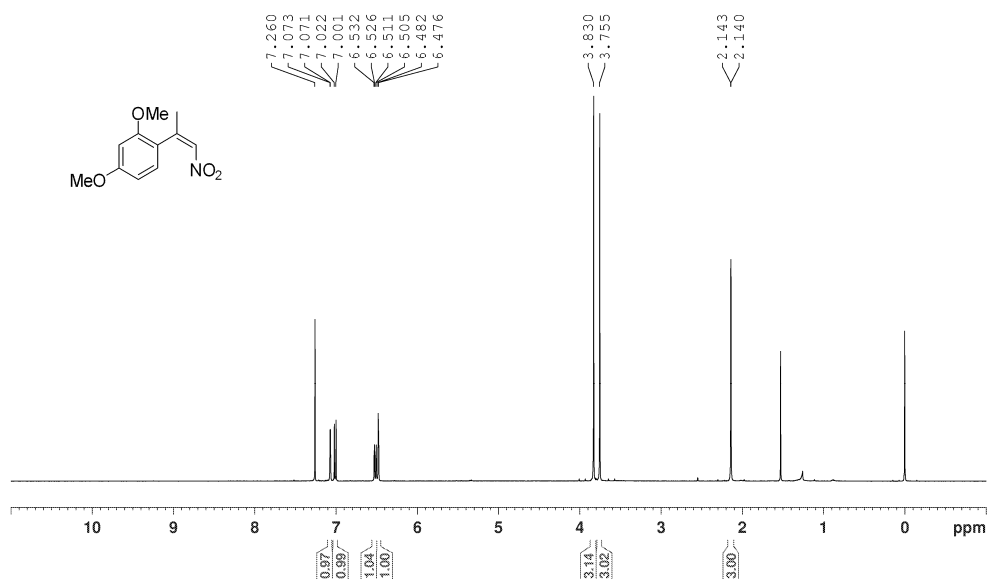



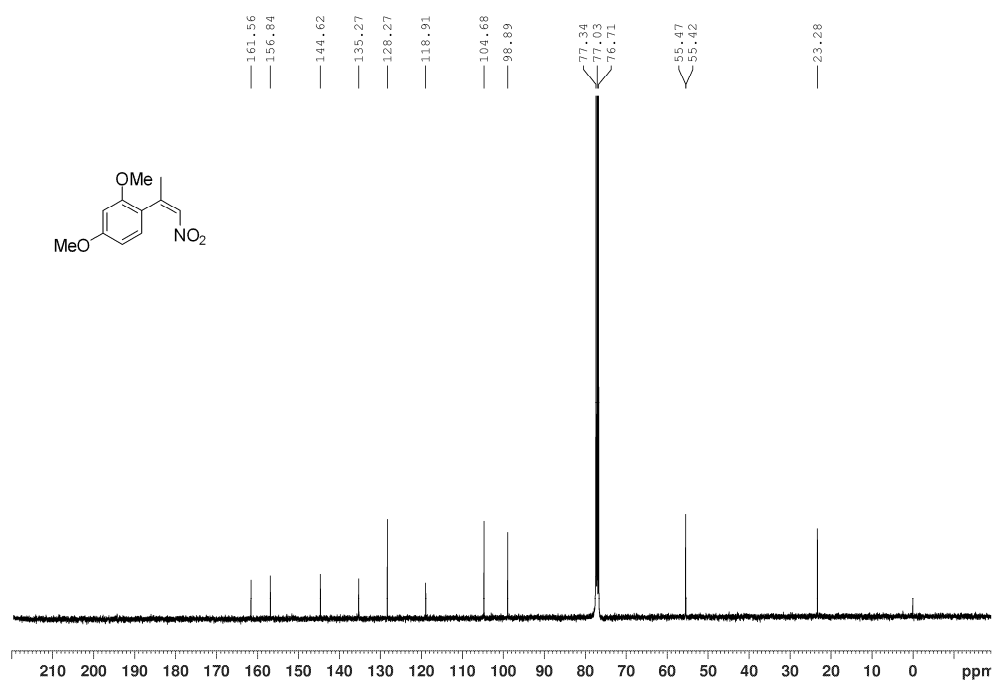

Supplement: c0cc01029d.pdf [file c0cc01029d.pdf]
